# Supplementary material for: Transfer semi-hydrogenation of terminal alkynes with a well-defined iron complex
Source: Royal Society of Chemistry journal article supplement (doi:10.1039/d3dt03248e), 2024-01-01
Supplement: d3dt03248e1.pdf [file d3dt03248e1.pdf]

## Supplementary Information

### Transfer Semi-hydrogenation of Terminal Alkynes with a Well-defined Iron Complex

Deep Chowdhury,<sup>a</sup> Souvik Goswami,<sup>a</sup> Gamidi Rama Krishna,<sup>b</sup> and Arup Mukherjee<sup>a,\*</sup>

*<sup>a</sup>Department of Chemistry, Indian Institute of Technology Bhilai, GEC Campus, Sejbahar, Raipur, Chhattisgarh 492015, India*

*<sup>b</sup>Centre for X-ray Crystallography, CSIR-National Chemical Laboratory,*

*Pune-411008, India*

Email: [arup@iitbhilai.ac.in](mailto:arup@iitbhilai.ac.in)

#### Table of Contents

1. General Information
2. Synthesis of the ligand (**L**)
3. Synthesis of the **Fe-1** complex
4. General Procedure for the transfer semi-hydrogenation of terminal alkynes
5. Control studies
6. Monitoring experiment the dehydrogenation of Me<sub>2</sub>NH·BH<sub>3</sub> with the <sup>11</sup>B NMR spectroscopy
7. General procedure for the detection of H<sub>2</sub> gas during the dehydrogenation of Me<sub>2</sub>NH·BH<sub>3</sub> in the presence of **Fe-1** and KO<sup>t</sup>Bu
8. <sup>1</sup>H and <sup>13</sup>C{<sup>1</sup>H} NMR spectra of the isolated compounds
9. GC Chromatogram of the reaction mixture, peak reports, and mass-spectra of the terminal alkenes
10. Crystallographic information of Fe-1 complex
11. Copies of <sup>1</sup>H and <sup>13</sup>C{<sup>1</sup>H} NMR spectra of the isolated products
12. References

## 1. General Information:

All chemicals were purchased from Sigma-Aldrich, Alfa-Aesar, Merk, Avra, Loba Chemie, and TCI at the highest purity grade and used for catalytic transfer semi-hydrogenation without further purification. Deuterated solvents were procured from Sigma-Aldrich. Unless otherwise mentioned, all syntheses were performed in standard glassware without any special precautions taken for the removal of moisture or air. NMR spectra were recorded in  $\text{CDCl}_3$  and TMS as internal standard on Bruker Avance 400/600 MHz spectrometers. Chemical shifts of  $^1\text{H}$  NMR spectra were given in parts per million with respect to TMS and the coupling constant ( $J$ ) was measured in Hz. The following abbreviations were used to describe the multiplicities: s= singlet, d= doublet, t= triplet, m= multiplet. GC-MS analyses were carried out on a Thermo Scientific Trace 1310 equipped with TG-5SILMS capillary column with ISQ 7000 single quadrupole mass spectrometer. GC analysis was performed on a Thermo Scientific Trace 1310 equipped with a packed column (ShinCarbon ST). High-resolution mass spectrometric analysis was carried out on the Agilent 6546 LC/Q-TOF instrument. UV-Vis studies were carried out on a Shimadzu UV-2600 instrument. FT-IR studies were carried out on a Perkin Elmer instrument.

## 2. Synthesis of the ligand (L):

The ligand was synthesized according to the reported procedure<sup>1</sup> with some modifications as follows:

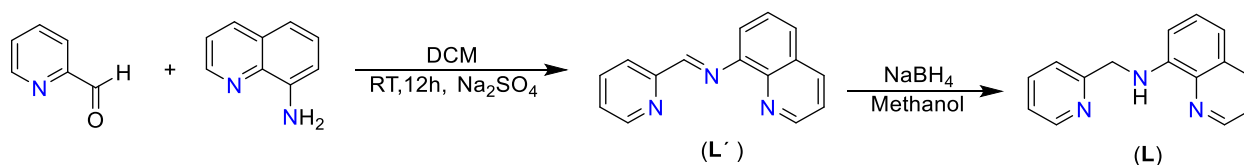

**Scheme S1.** Synthesis of ligand **L**.

8-aminoquinoline (0.721 g, 5 mmol) was taken in a 100 mL round-bottom flask and dissolved in  $\text{DCM}$  (30 mL) along with the addition of  $\text{Na}_2\text{SO}_4$  (~300 mg). To it, 2-pyridinecarboxaldehyde (0.536 g, 5 mmol) was added dropwise. The resulting reaction mixture was stirred for 12 hours at room temperature. After that, the solvent was removed completely under reduced pressure. The resulting yellow oil was dissolved in  $\text{MeOH}$  (20 mL) and warmed in an oil bath at  $45^\circ\text{C}$ . To it,

excess NaBH<sub>4</sub> (0.757 g, 20 mmol) was added in small portions over a period of one hour, and then the reaction mixture was stirred for another 12 hours under warm conditions. After the evaporation of the solvent completely, the residue was treated with a brine solution and the organic components were extracted with 3 x 50 mL of DCM. The combined organic layers were dried over anhydrous Na<sub>2</sub>SO<sub>4</sub>. Filtration and evaporation of the solvent yielded the crude product as a brown oil. Further purification was done by column chromatography on silica using EtOAc/hexane as eluent to afford the ligand (**L**) as a thick reddish-brown oil, Yield: 66%.

<sup>1</sup>H NMR (400 MHz, CDCl<sub>3</sub>): δ 8.79 (d, *J* = 3.3 Hz, 1H), 8.65 (d, *J* = 4.3 Hz, 1H), 8.09 (d, *J* = 8.2 Hz, 1H), 7.69 (t, 1H), 7.46–7.38 (m, 2H), 7.34 (t, *J* = 7.9 Hz, 1H), 7.19 (dd, *J* = 13.9, 7.3 Hz, 1H), 7.09 (d, *J* = 8.1 Hz, 1H), 6.99 (d, *J* = 25.4 Hz, 1H), 6.63 (d, *J* = 7.6 Hz, 1H), 4.74 (s, 2H) ppm.

ESI-mass calculated for [M+H]<sup>+</sup>: 236.1182, Found: 236.1203.

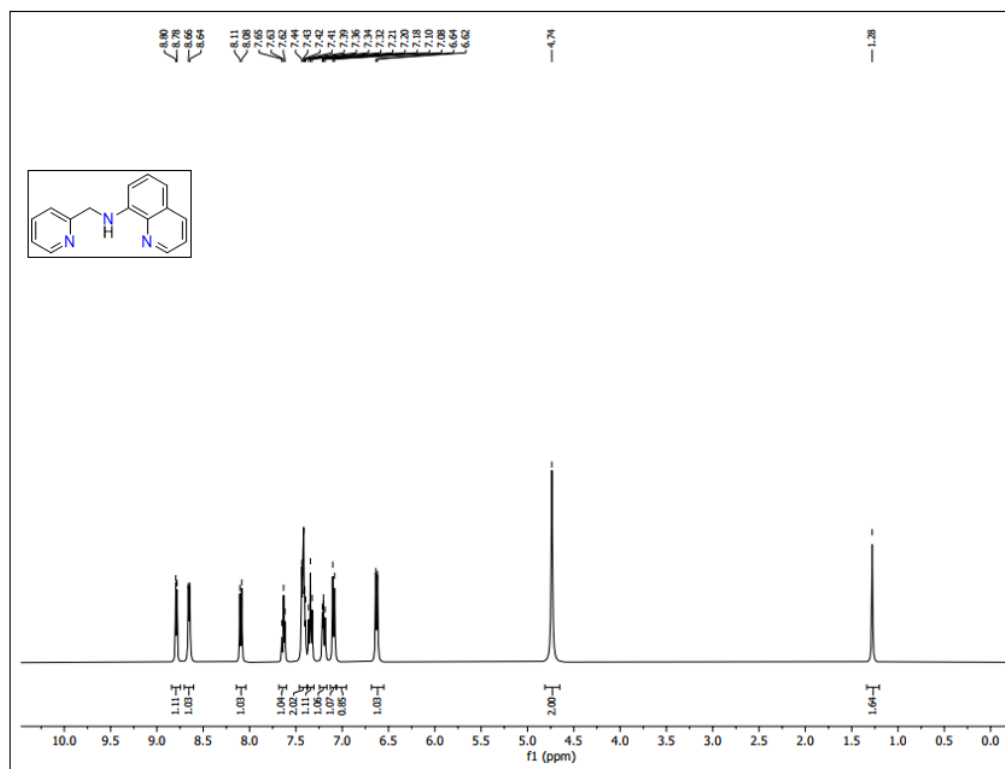

**Figure S1.** <sup>1</sup>H NMR (400 MHz) spectrum of ligand **L** in CDCl<sub>3</sub>.

### 3. Synthesis of the Fe-1 complex:

#### Procedure 1.

To a solution of **L** (235.3 mg, 1 mmol) in acetonitrile was added  $\text{FeCl}_2 \cdot 4\text{H}_2\text{O}$  (198.8 mg, 1 mmol) in a reaction flask. The reaction mixture was stirred overnight under aerobic conditions at room temperature followed by the addition of diethyl ether to obtain a deep green solid. The crude solid was filtered and dried under a vacuum to obtain 161 mg product. Subsequently, the solid was crystallized at room temperature from DCM/hexane solution to obtain the deep green crystals of **Fe-1**, Yield: 70% with respect to  $\text{FeCl}_2 \cdot 4\text{H}_2\text{O}$ .

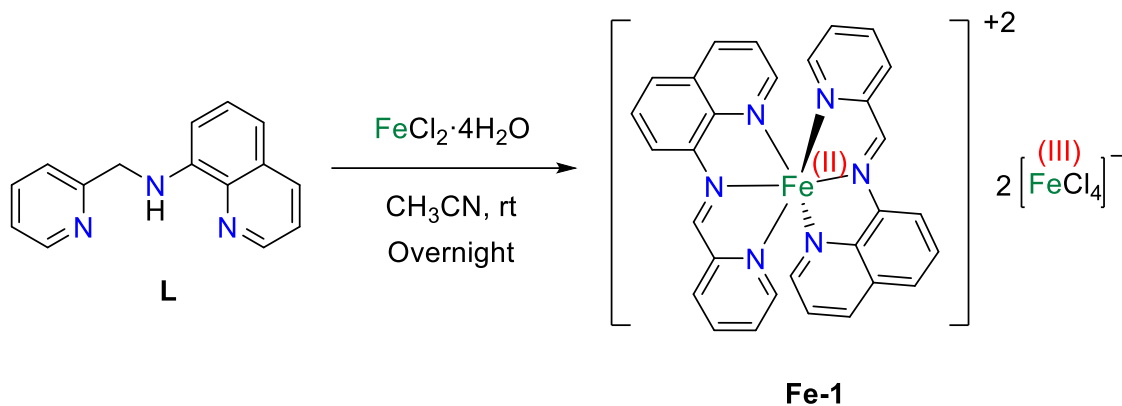

**Scheme S2a.** Synthesis of **Fe-1** complex using 1:1 ligand and metal precursor.

#### Procedure 2.

To a solution of **L** (235.3 mg, 1 mmol) in acetonitrile was added  $\text{FeCl}_2 \cdot 4\text{H}_2\text{O}$  (387.6 mg, 2 mmol) in a reaction flask. The reaction mixture was stirred overnight under aerobic conditions at room temperature followed by the addition of diethyl ether to obtain a deep green solid. The crude solid was filtered and dried under a vacuum to obtain 358 mg product. Subsequently, the solid was crystallized at room temperature from DCM/hexane solution to obtain the deep green crystals of **Fe-1**, Yield: 78% with respect to ligand (**L**).

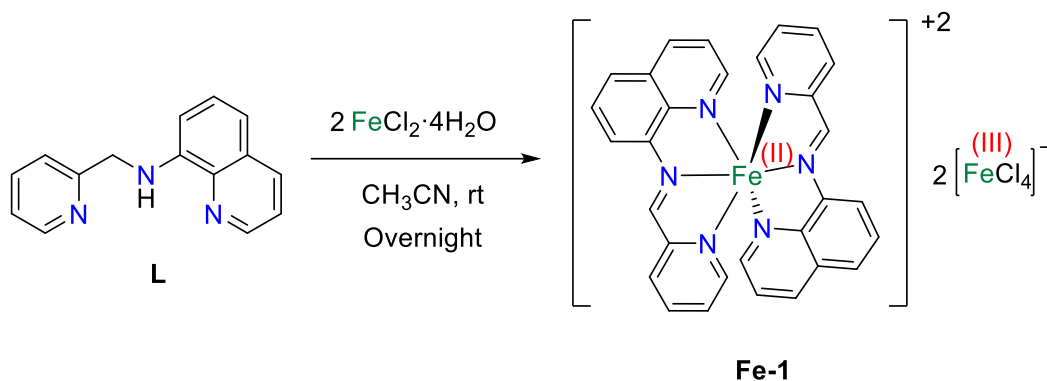

**Scheme S2b.** Synthesis of **Fe-1** complex 1:2 ligand and metal precursor.

### Procedure 3.

To a solution of **L'** (235.3 mg, 1 mmol) in acetonitrile was added  $\text{FeCl}_2 \cdot 4\text{H}_2\text{O}$  (387.6 mg, 2 mmol) in a reaction flask. The reaction mixture was stirred overnight under aerobic conditions at room temperature followed by the addition of diethyl ether to obtain a deep green solid. The crude solid was filtered and dried under a vacuum to obtain 298.3 mg product. Subsequently, the solid was crystallized at room temperature from DCM/hexane solution to obtain the deep green crystals of **Fe-1**, Yield: 65% with respect to (**L'**).

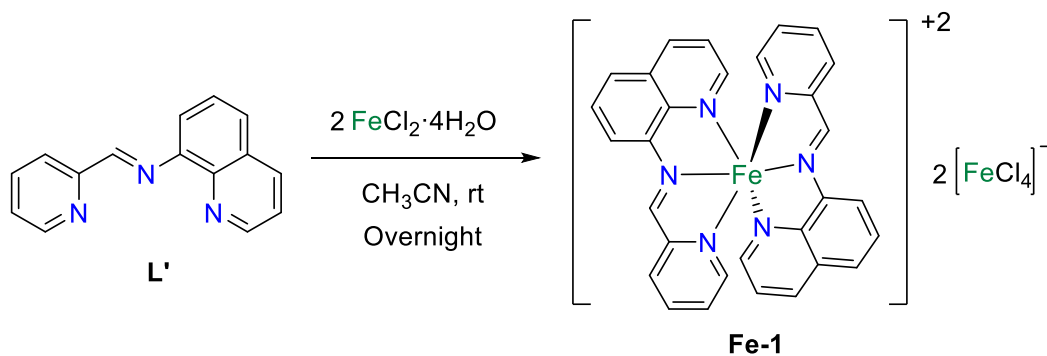

**Scheme S2c.** Synthesis of **Fe-1** complex using imine ligand **L'**.

### Characterization of Fe-1 complex:

FT-IR (ATR) Spectra:  $\nu$  ( $\text{cm}^{-1}$ ) = 1595, 1506, 1455, 1595, 1395, 1295, 1204, 1595, 1156, 830, 760.

UV-Vis absorption spectroscopy (methanol): wavelength (nm): 230, 350, 370.

ESI-MS(+): Calculated for  $[\text{M}-2\text{FeCl}_4]^{2+}$ : 522.1255, Found: 522.1240.

Elemental analysis: Anal. Calcd for  $C_{30}H_{22}Cl_8N_6Fe_3$ : C, 39.27; H, 2.42; N, 9.16. Found: C, 39.24; H, 2.41; N, 9.18.

(i) IR absorption spectroscopy of Fe-1 complex:

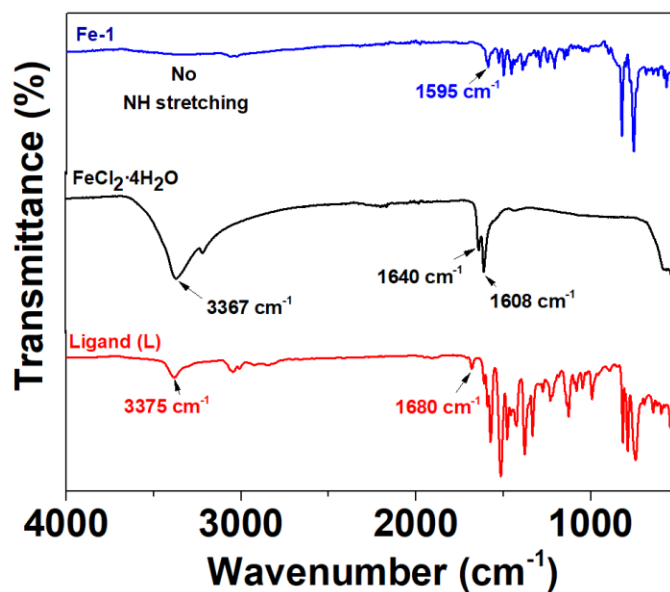

Figure S2. IR absorption spectra of L,  $FeCl_2 \cdot 2H_2O$  and Fe-1 complex.

(ii) UV-Vis absorption spectroscopy:

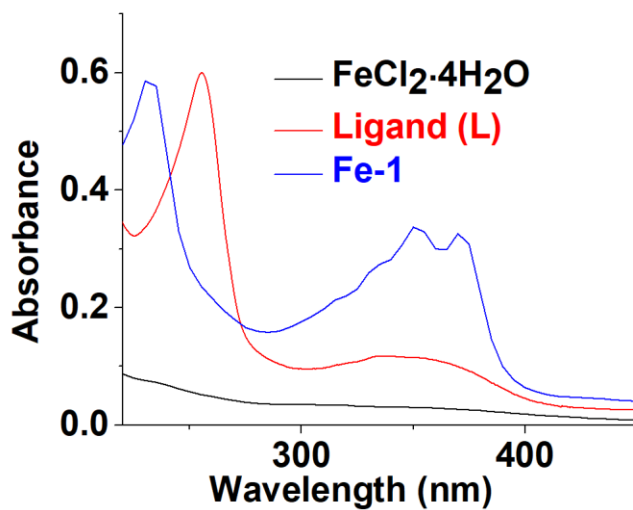

Figure S3. UV-Vis absorption spectra of L,  $FeCl_2 \cdot 2H_2O$ , and Fe-1 complex in methanol.

**(iii) Isotropic Mass distribution:**

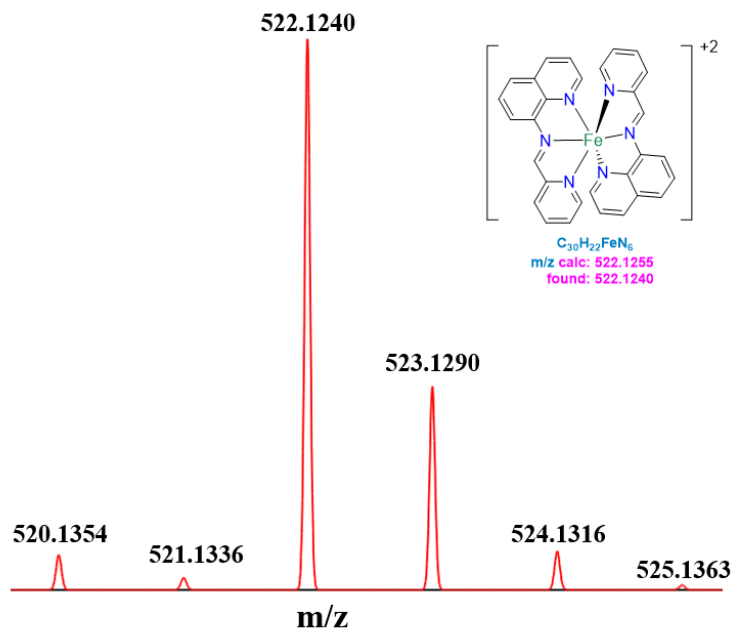

**Figure S4.** Isotropic Mass distribution of **Fe-1** complex.

**4. General Procedure for the transfer semi-hydrogenation of terminal alkynes:**

In a 15 mL thick-wall dry-sealed tube, terminal alkyne (0.2 mmol, 1.0 equiv.), **Fe-1** (0.005 mmol, 1 mol%), KO<sup>t</sup>Bu (0.005 mmol, 0.01 mmol), and Me<sub>2</sub>NH·BH<sub>3</sub> (0.3 mmol, 1.5 equiv.) were dissolved in <sup>i</sup>PrOH (1 mL) in a N<sub>2</sub> filled glovebox. The tube was sealed tightly with the PTFE screw cap and the resultant reaction mixture was brought outside of the box and kept in a preheated oil bath at 100 °C for 20 h. After completion of the reaction, the mixture was cooled down, opened slowly inside the fume hood, and quenched with the addition of methanol. Following this, 1 equiv. of internal standard (mesitylene) was added to the reaction mixture and a small aliquot was injected in GC-MS to find out the yield of the semi-hydrogenated product. For compounds **2a** and **2b**, the crude reaction mixture was purified through column chromatography using ethyl acetate/hexane as eluent.

**CAUTION:** Flammable H<sub>2</sub> generated during the reaction. Hence, proper care needs to be taken during the experiment with the reaction vessel.

## 5. Control Studies:

### 5a. Procedure for the synthesis of Fe-2 by exchanging the anion of Fe-1 and transfer semi-hydrogenation of phenylacetylene using Fe-2 as a catalyst:

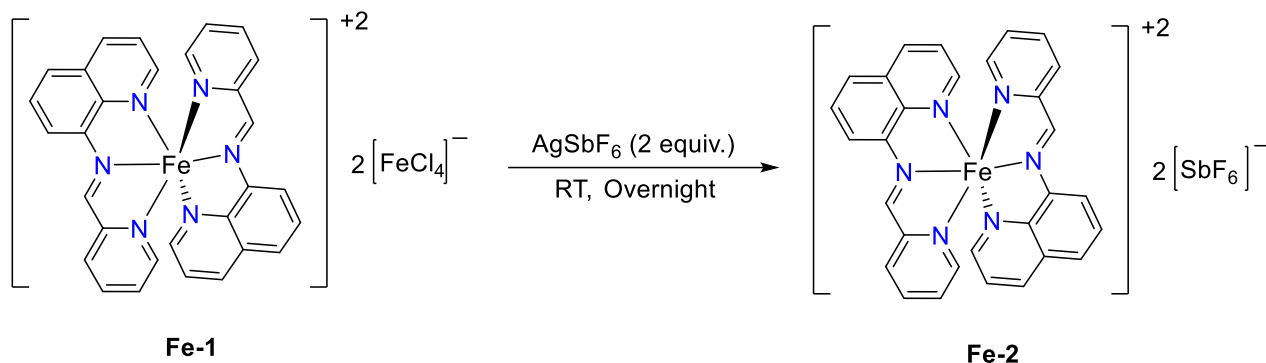

**Scheme S3.** Exchange of anion of **Fe-1** complex to synthesis **Fe-2** complex.

To a solution of **Fe-1** (1 mmol) in acetonitrile  $\text{AgSbF}_6$  (2 mmol) was added to a reaction flask. The reaction mixture was stirred overnight at room temperature followed by the addition of diethyl ether to obtain a deep green solid. The crude solid was filtered and dried under a vacuum to obtain the deep green crystals of **Fe-2**, Yield: 60%.

FT-IR (ATR) Spectra:  $\nu$  ( $\text{cm}^{-1}$ ) = 1595, 1508, 1455, 1391, 1293, 1210, 1048, 830, 760, 655.

UV-Vis absorption spectroscopy (methanol): wavelength (nm): 233, 352, 374.

ESI-MS(+): Calculated for  $[\text{M}+\text{Na}]^+$ : 1016.9041, Found: 1016.8995.

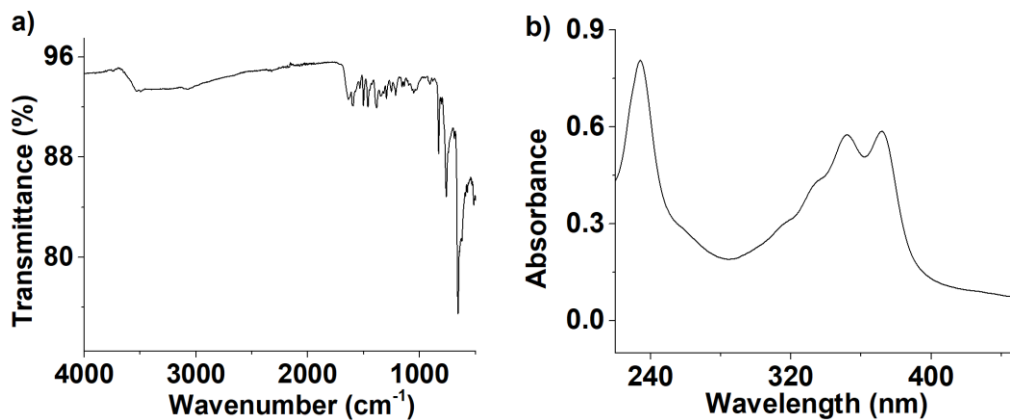

**Figure S5.** a) IR absorption spectra; b) UV-Vis absorption spectra in methanol of **Fe-2** complex.

Now, in a 15 mL thick-wall dry-sealed tube, phenylacetylene (0.2 mmol, 1.0 equiv.), **Fe-2** (0.005 mmol, 1 mol%), KO<sup>t</sup>Bu (0.005 mmol, 0.01 mmol), and Me<sub>2</sub>NH·BH<sub>3</sub> (0.3 mmol, 1.5 equiv.) were dissolved in <sup>i</sup>PrOH (1 mL) in a N<sub>2</sub> filled glovebox. The tube was sealed tightly with the PTFE screw cap and the resultant reaction mixture was brought outside of the box and kept in a preheated oil bath at 100 °C for 20 h. After completion of the reaction, the mixture was cooled down, opened slowly inside the fume hood, and quenched with the addition of methanol. Following this, 1 equiv. of internal standard (mesitylene) was added to the reaction mixture and a small aliquot was injected in GC-MS to find out the yield of the semi-hydrogenated product. Yield = 75%

**5b. Synthesis of Fe-3 complex and transfer semi-hydrogenation of phenylacetylene using Fe-3 as a catalyst:**

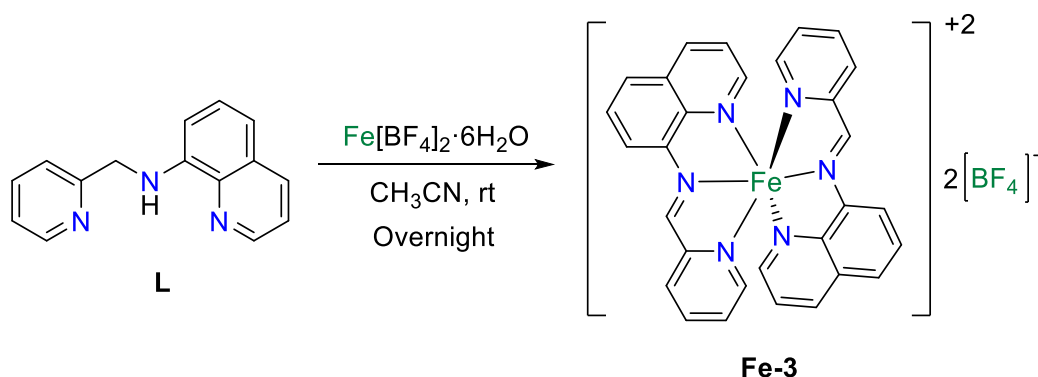

**Scheme S4.** Synthesis of **Fe-3** complex.

To a solution of **L** (1 mmol) in acetonitrile was added FeBF<sub>4</sub>·6H<sub>2</sub>O (1 mmol) in a reaction flask. The reaction mixture was stirred overnight at room temperature followed by the addition of diethyl ether to obtain a deep green solid. The crude solid was filtered and dried under a vacuum. Subsequently, the solid was crystallized at room temperature from acetonitrile/toluene solution to obtain the deep green crystals of **Fe-3**, Yield: 50%.

<sup>19</sup>F NMR: δ −148.38 ppm

FT-IR (ATR) Spectra: ν (cm<sup>−1</sup>) = 1595, 1504, 1455, 1398, 1293, 1254, 1219, 1048, 830, 516.

UV-Vis absorption spectroscopy (methanol): wavelength (nm): 234, 353, 372.

ESI-MS(+): Calculated for [M+Na]<sup>+</sup> : 719.1211, Found: 719.1205.

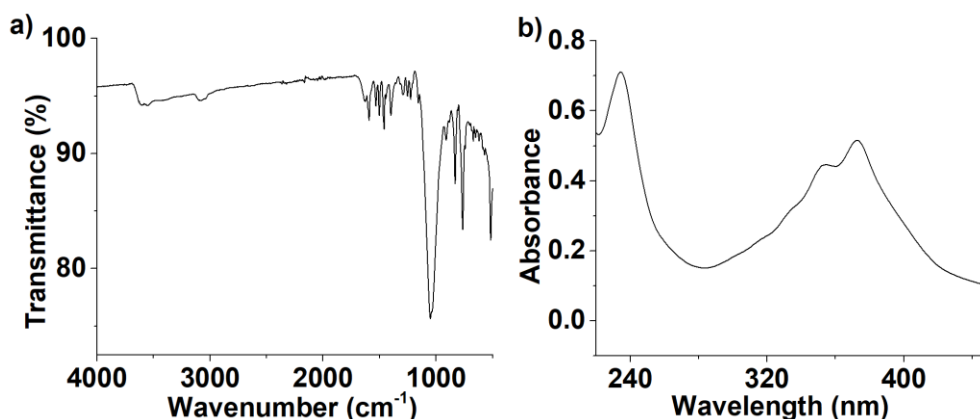

**Figure S6.** a) IR absorption spectra; b) UV-Vis absorption spectra in methanol of **Fe-3** complex.

Subsequently, in a 15 mL thick-wall dry-sealed tube, phenylacetylene (0.2 mmol, 1.0 equiv.), **Fe-3** (0.005 mmol, 1 mol%), KO<sup>t</sup>Bu (0.005 mmol, 0.01 mmol), and Me<sub>2</sub>NH·BH<sub>3</sub> (0.3 mmol, 1.5 equiv.) were dissolved in <sup>i</sup>PrOH (1 mL) in a N<sub>2</sub> filled glovebox. The tube was sealed tightly with the PTFE screw cap and the resultant reaction mixture was brought outside of the box and kept in a preheated oil bath at 100 °C for 20 h. After completion of the reaction, the mixture was cooled down, opened slowly inside the fume hood, and quenched with the addition of methanol. Following this, 1 equiv. of internal standard (mesitylene) was added to the reaction mixture and a small aliquot was injected in GC-MS to find out the yield of the semi-hydrogenated product. Yield = 85%

#### 5c. Synthesis of Fe-4 complex using FeCl<sub>2</sub>·4H<sub>2</sub>O and proligand (L) under N<sub>2</sub> atmosphere.

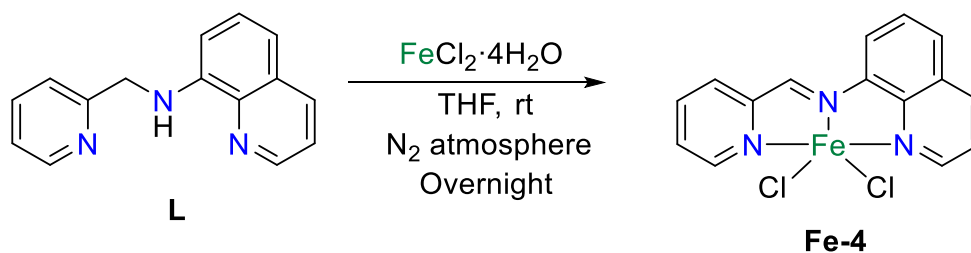

**Scheme S5.** synthesize **Fe-4** complex.

To a solution of **L** (235.3 mg, 1 mmol) in THF was added FeCl<sub>2</sub>·4H<sub>2</sub>O (198.8 mg, 1 mmol) in a reaction flask in an N<sub>2</sub>-filled glovebox. The reaction mixture was stirred overnight under the inert condition at room temperature which resulted in the formation of a brownish-red solid

precipitation. The reaction mixture was filtered and washed with diethyl ether to obtain a brownish-red solid. The crude solid was dried under a vacuum to obtain 325 mg product.

**FT-IR (ATR) Spectra:**  $\nu$  ( $\text{cm}^{-1}$ ) = 1593, 1500, 1382, 1341, 1285, 1090, 1014, 824, 762, 485.

**UV-Vis absorption spectroscopy (methanol):** wavelength (nm): 372, 353, 255, 234, 202.

**ESI-MS(+):** Calculated for  $[\text{M}-\text{Cl}]^+$ : 323.999, Found: 324.0103.

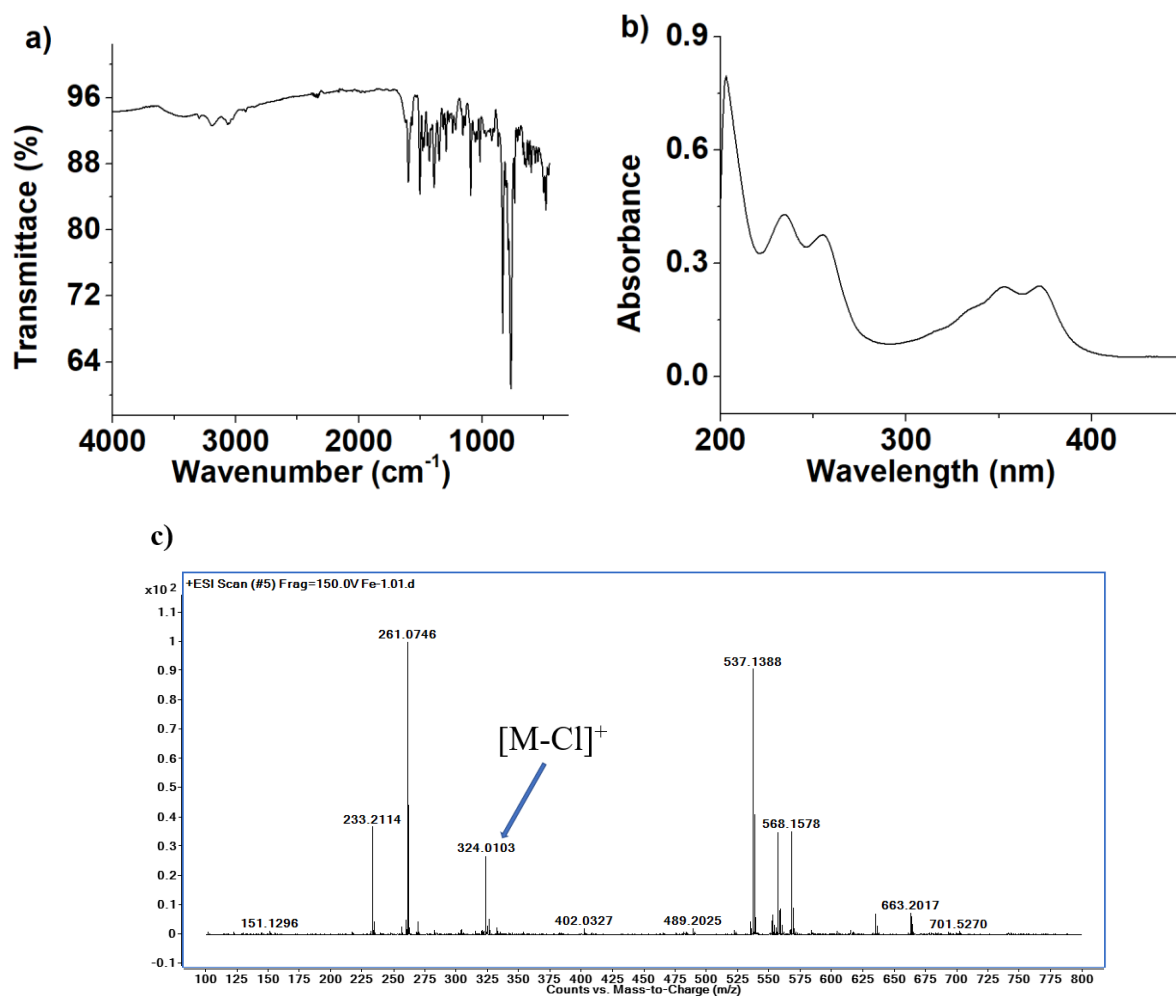

**Figure S7.** a) IR absorption spectra; b) UV-Vis absorption spectra; c) ESI-MS(+) of the **Fe-4**.

**(a) GC-MS data of the alkenes:**

The data is based on the measurement of the sample in Thermo-Fisher Trace 1310 GC Chromatography and ISQ 7000 single quadrupole mass spectrometer equipped with TG-5SILMS capillary column and He as carrier gas with flow rate of 1 mL/minute.

|                                                                                                                                   |                                                                                                                                   |                                                                                                                                     |
|-----------------------------------------------------------------------------------------------------------------------------------|-----------------------------------------------------------------------------------------------------------------------------------|-------------------------------------------------------------------------------------------------------------------------------------|
| 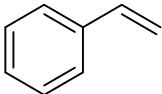<br>$t_r = 3.6 \text{ min}$<br>$m/z = 104.11$    | 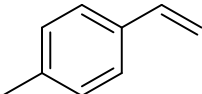<br>$t_r = 4.06 \text{ min}$<br>$m/z = 118.14$   | 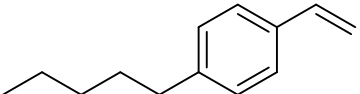<br>$t_r = 7.27 \text{ min}$<br>$m/z = 175.20$    |
| 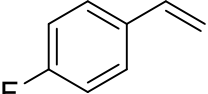<br>$t_r = 3.10 \text{ min}$<br>$m/z = 122.08$   | 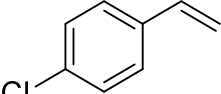<br>$t_r = 4.78 \text{ min}$<br>$m/z = 140.07$   | 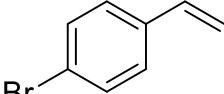<br>$t_r = 5.57 \text{ min}$<br>$m/z = 184.02$   |
| 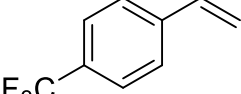<br>$t_r = 3.27 \text{ min}$<br>$m/z = 172.08$ | 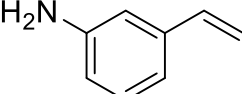<br>$t_r = 5.99 \text{ min}$<br>$m/z = 120.15$ | 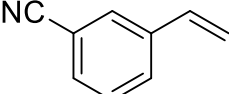<br>$t_r = 5.99 \text{ min}$<br>$m/z = 129.04$ |
| 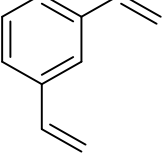<br>$t_r = 5.11 \text{ min}$<br>$m/z = 131.17$ | 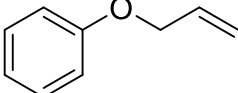<br>$t_r = 4.77 \text{ min}$<br>$m/z = 135.11$ | 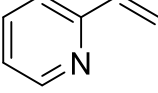<br>$t_r = 3.42 \text{ min}$<br>$m/z = 106.09$ |

|  |                                                                                                                                                               |  |
|--|---------------------------------------------------------------------------------------------------------------------------------------------------------------|--|
|  | 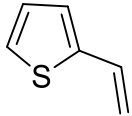 <p> <math>t_r = 3.06 \text{ min}</math><br/> <math>m/z = 110.05</math> </p> |  |
|--|---------------------------------------------------------------------------------------------------------------------------------------------------------------|--|

**6. Monitoring experiment the dehydrogenation of  $\text{Me}_2\text{NH}\cdot\text{BH}_3$  with the  $^{11}\text{B}$  NMR spectroscopy:**

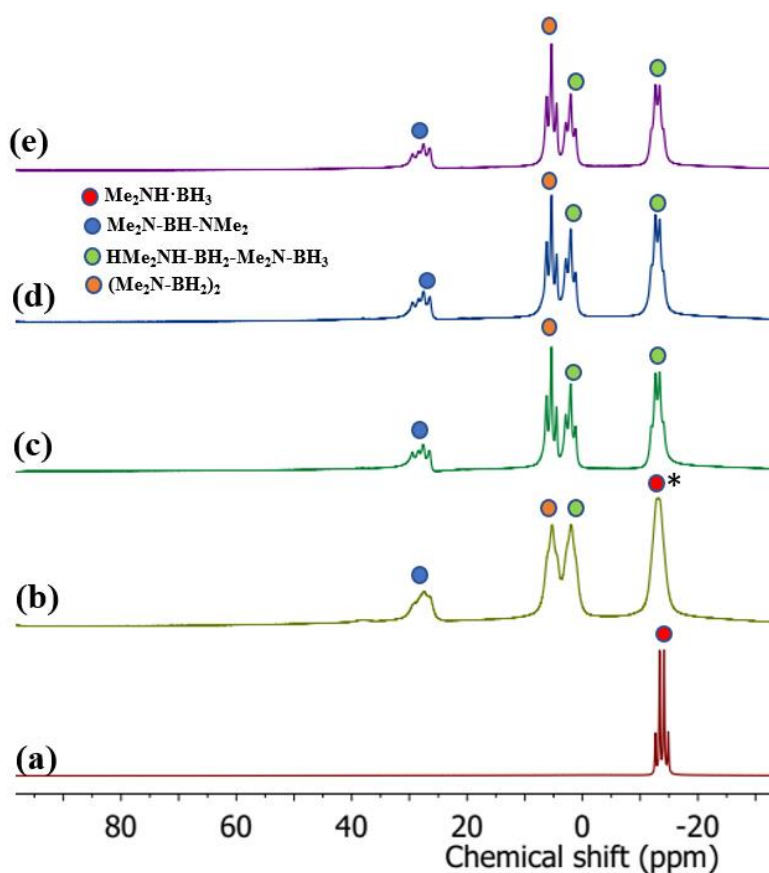

**Figure S8.** Monitoring by  $^{11}\text{B}$  NMR spectroscopy of the reaction between **Fe-1**/ $\text{KO}^t\text{Bu}$  and  $\text{Me}_2\text{NH}\cdot\text{BH}_3$  in  $\text{C}_6\text{D}_6$ : a) DMAB in  $\text{C}_6\text{D}_6$ ; b) reaction mixture after 0 h; c) reaction mixture after 3 h; d) reaction mixture after 6 h; e) reaction mixture after 24 h; \* $\text{BH}_3$  resonance of  $\text{HMe}_2\text{NBH}_2\text{Me}_2\text{NBH}_3$  at  $-13 \text{ ppm}$  overlaps with DMAB peak.

In a reaction tube containing  $\text{Me}_2\text{NH}\cdot\text{BH}_3$  (0.5 mmol, 1.5 equiv.), **Fe-1** (1 mol%),  $\text{KO}^t\text{Bu}$  (5 mol%) were taken in  $\text{C}_6\text{D}_6$  under a  $\text{N}_2$  filled glove-box and stirred for a few minutes. After that, the reaction mixture was filtered through a syringe, and the filtrate was taken in a screw-cap NMR tube and  $^{11}\text{B}$  NMR was measured. Following this, the  $^{11}\text{B}$  NMR spectroscopy was recorded after different time intervals (3 h, 6 h and 24 h) to monitor the different boron species generated during the dehydrogenation of  $\text{Me}_2\text{NH}\cdot\text{BH}_3$ .

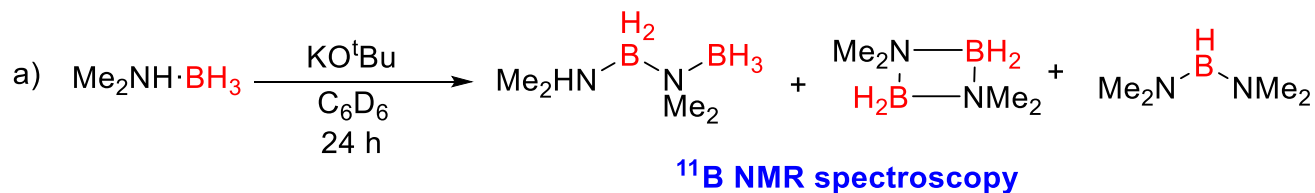

**Scheme S6.** a) Controlled experiment for disproportionation of  $\text{Me}_2\text{NH}\cdot\text{BH}_3$  mediated by  $\text{KO}^t\text{Bu}$ ;

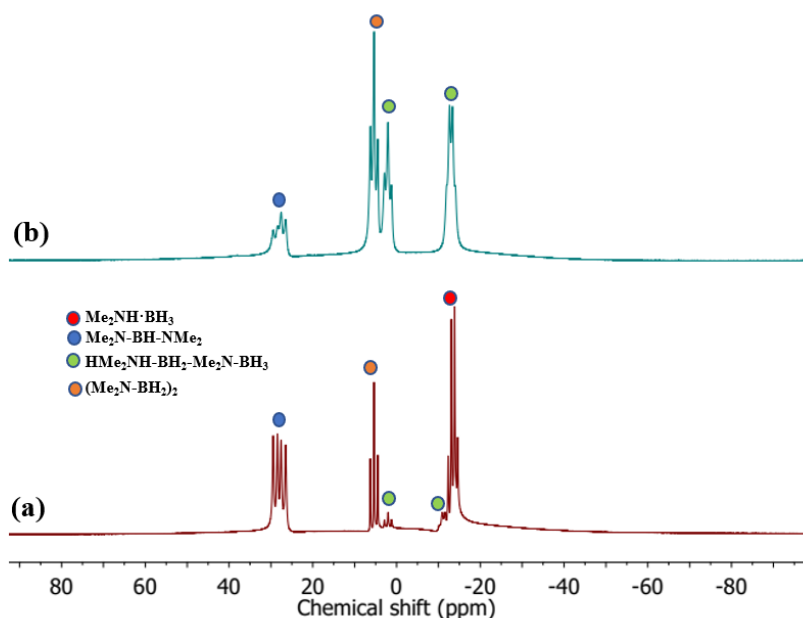

**Figure S9.** a) The  $^{11}\text{B}$  NMR spectroscopy of the reaction between  $\text{Me}_2\text{NH}\cdot\text{BH}_3$  and  $\text{KO}^t\text{Bu}$  in  $\text{C}_6\text{D}_6$  after 24 h; b) The  $^{11}\text{B}$  NMR spectroscopy of the reaction between **Fe-1**,  $\text{KO}^t\text{Bu}$ , and  $\text{Me}_2\text{NH}\cdot\text{BH}_3$  in  $\text{C}_6\text{D}_6$  after 24 h.

we have conducted an experiment of  $\text{Me}_2\text{NH}\cdot\text{BH}_3$  and  $\text{KO}^t\text{Bu}$  mixing them in 1:1 ratio in the absence of the **Fe-1** (Scheme S6), where we found that even heating the reaction mixture up-to 60  $^\circ\text{C}$ , most of the  $\text{Me}_2\text{NH}\cdot\text{BH}_3$  remains unreacted and rest amount is getting disproportionated to  $\text{Me}_2\text{N}$ -

BH-NMe<sub>2</sub> and (Me<sub>2</sub>N-BH<sub>2</sub>)<sub>2</sub> (Fig. S9) while in presence of catalytic amount **Fe-1** / KO<sup>t</sup>Bu, Me<sub>2</sub>NH·BH<sub>3</sub> undergoes almost full dehydrogenation leading to the formation of (Me<sub>2</sub>N-BH<sub>2</sub>)<sub>2</sub>, Me<sub>2</sub>NH-BH<sub>2</sub>-Me<sub>2</sub>N-BH<sub>3</sub>, and Me<sub>2</sub>N-BH-NMe<sub>2</sub> during the disproportionation protocol (Fig. S8). This experiment clearly signifies the role of **Fe-1** in observed disproportionation of Me<sub>2</sub>NH·BH<sub>3</sub>.

## 7. General procedure for the detection of H<sub>2</sub> gas during the dehydrogenation of Me<sub>2</sub>NH·BH<sub>3</sub> in the presence of **Fe-1** and KO<sup>t</sup>Bu:

An over dried Schlenk tube was charged with Me<sub>2</sub>NH·BH<sub>3</sub> (0.5 mmol, 1 equiv.), **Fe-1** (1 mol%) and KO<sup>t</sup>Bu (5 mol%) in a N<sub>2</sub> filled glove-box. The tube was sealed tightly with septa and the resultant reaction mixture was stirred for 24 h at room temperature. Subsequently, the generated gas in the tube was injected in GC through air tight syringe to find out the evolution of the H<sub>2</sub> gas.

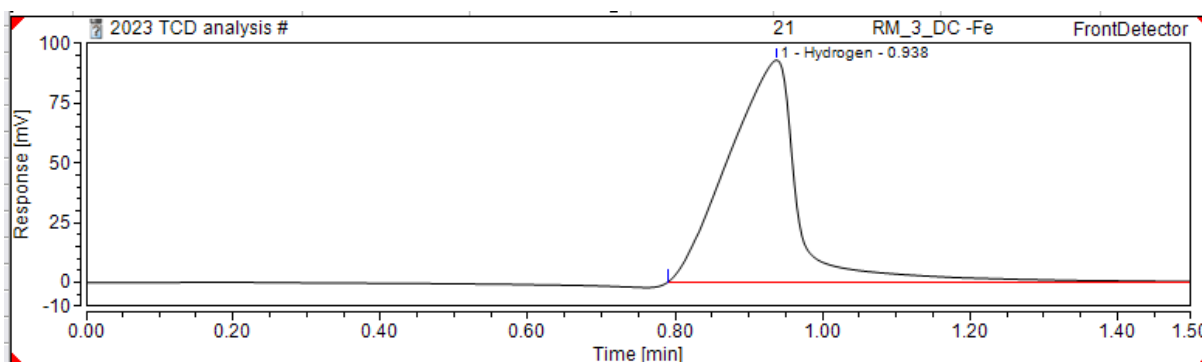

**Figure S10.** Detection of H<sub>2</sub> gas through the GC in TCD detector for the dehydrogenation of Me<sub>2</sub>NH·BH<sub>3</sub> in the presence of **Fe-1**/KO<sup>t</sup>Bu under neat conditions.

## 8. <sup>1</sup>H and <sup>13</sup>C{<sup>1</sup>H} NMR Spectra of the Isolated Compounds:

**Styrene (2a)**<sup>2</sup>: Isolated yield (17.5 mg, 84%). <sup>1</sup>H NMR (600 MHz, CDCl<sub>3</sub>): δ (ppm): 7.29 (dd, *J* = 7.1, 3.3 Hz, 2H), 7.20 (ddd, *J* = 7.6, 6.7, 3.8 Hz, 1H), 7.16-7.12 (m, 1H), 6.61 (m, 1H), 5.64 (m, 1H), 5.13 (ddd, *J* = 10.9, 2.8, 1.8 Hz, 1H); <sup>13</sup>C{<sup>1</sup>H} NMR (125 MHz, CDCl<sub>3</sub>): δ (ppm): 137.67, 137.0, 128.61, 127.89, 126.32, 113.87.

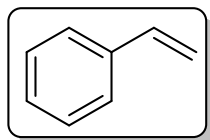

**4-vinylanisole (2b)<sup>2</sup>** : Isolated yield (24.5 mg, 91%). <sup>1</sup>H NMR (600 MHz, CDCl<sub>3</sub>): δ (ppm): 7.50 (m, 2H), 7.01 (m, 2H), 6.84 (m, 1H), 5.80 (m, 1H), 5.30 (m, 1H), 3.89 (s, 3H); <sup>13</sup>C{<sup>1</sup>H} NMR (125 MHz, CDCl<sub>3</sub>): δ (ppm): 159.63, 136.5, 130.589, 127.57, 114.079, 111.57, 55.20.

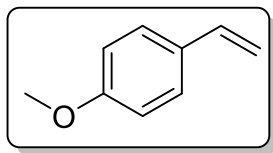

## 9. GC Chromatogram of the reaction mixture, peak reports, and mass-spectra of the terminal alkenes

### (i) GC Chromatogram of the reaction mixture of compound 2a:

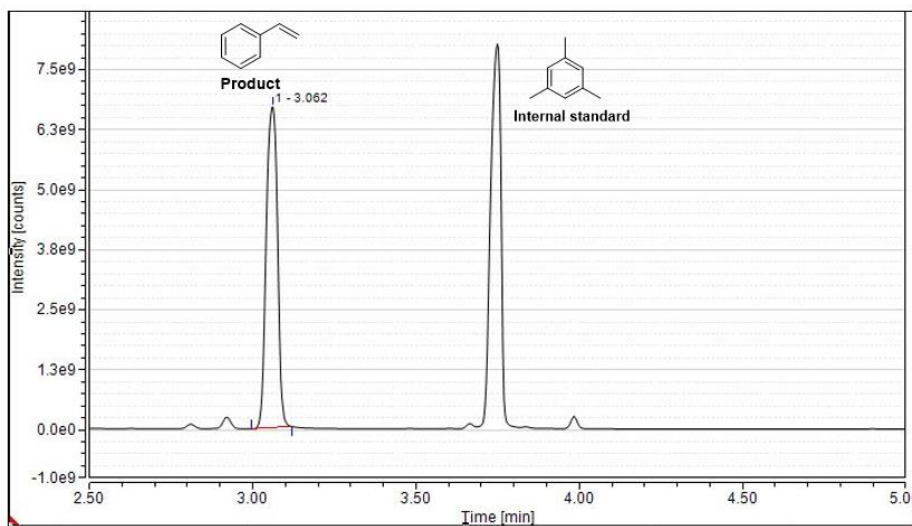

### Peak Report

| Peak | Retention Time (min) | Peak Area | Name       |
|------|----------------------|-----------|------------|
| 1    | 3.06                 | 272551954 | Styrene    |
| 2    | 3.77                 | 294106570 | Mesitylene |

### ESI-MS Spectra of styrene

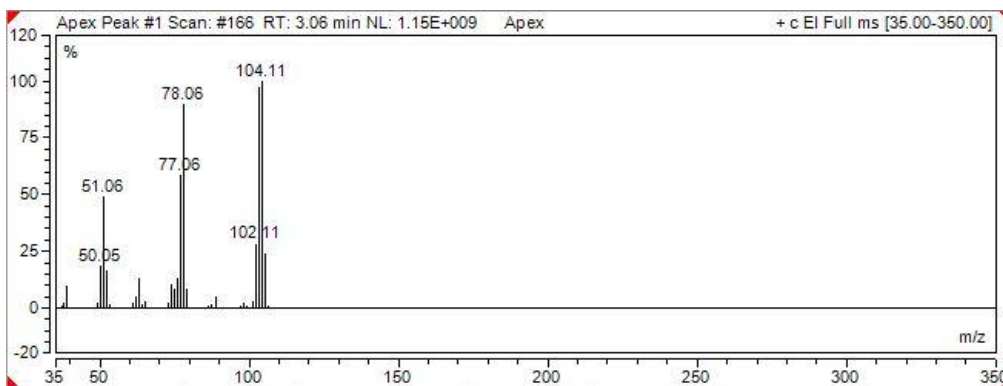

(ii) GC Chromatogram of the reaction mixture of compound 2b:

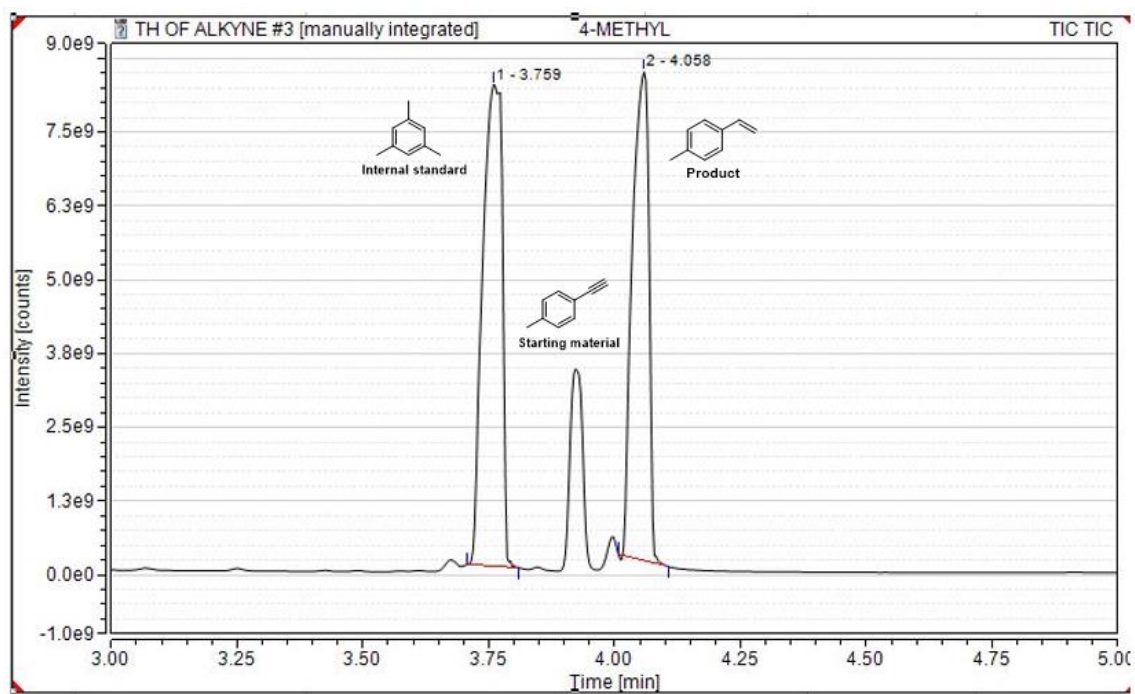

Peak Report

| Peak | Retention Time (min) | Peak Area | Name            |
|------|----------------------|-----------|-----------------|
| 1    | 4.06                 | 313555905 | 4-methylstyrene |
| 2    | 3.77                 | 365815044 | Mesitylene      |

ESI-MS Spectra of 4-methylstyrene

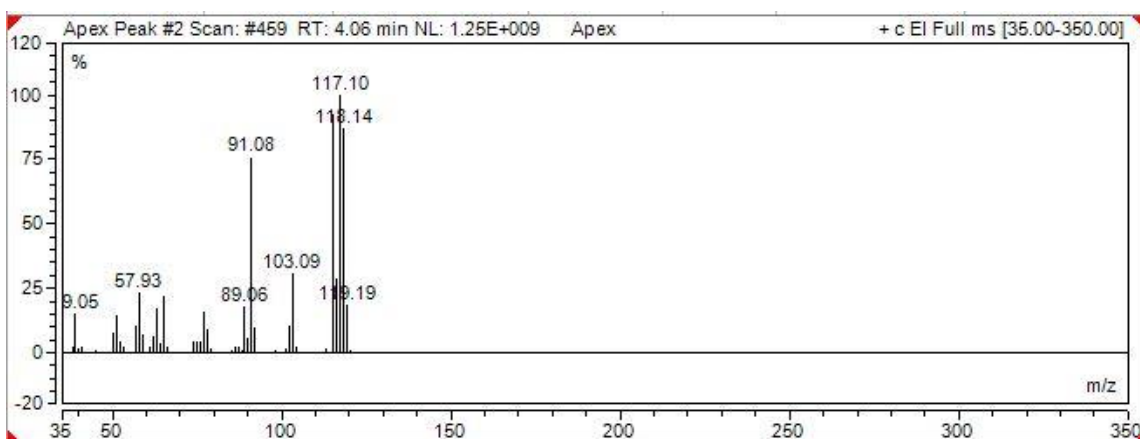

(iii) GC Chromatogram of the reaction mixture of compound 2c:

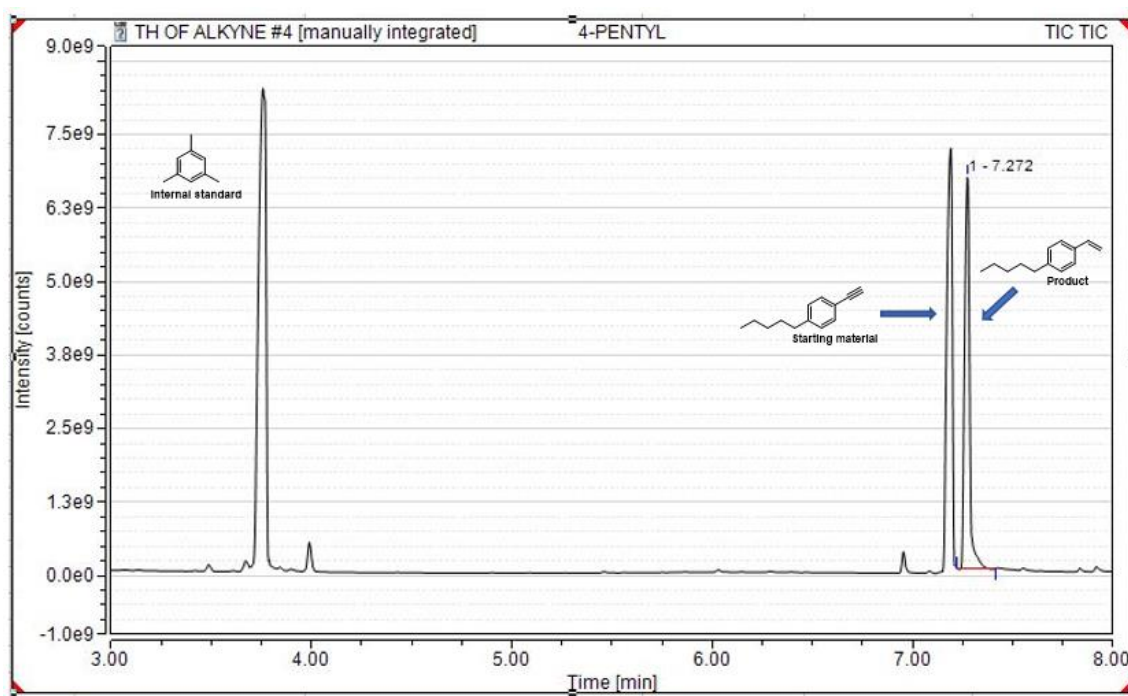

Peak Report

| Peak | Retention Time (min) | Peak Area | Name            |
|------|----------------------|-----------|-----------------|
| 1    | 7.27                 | 191747190 | 4-pentylstyrene |
| 2    | 3.77                 | 347404193 | Mesitylene      |

ESI-MS Spectra of 4-pentylstyrene

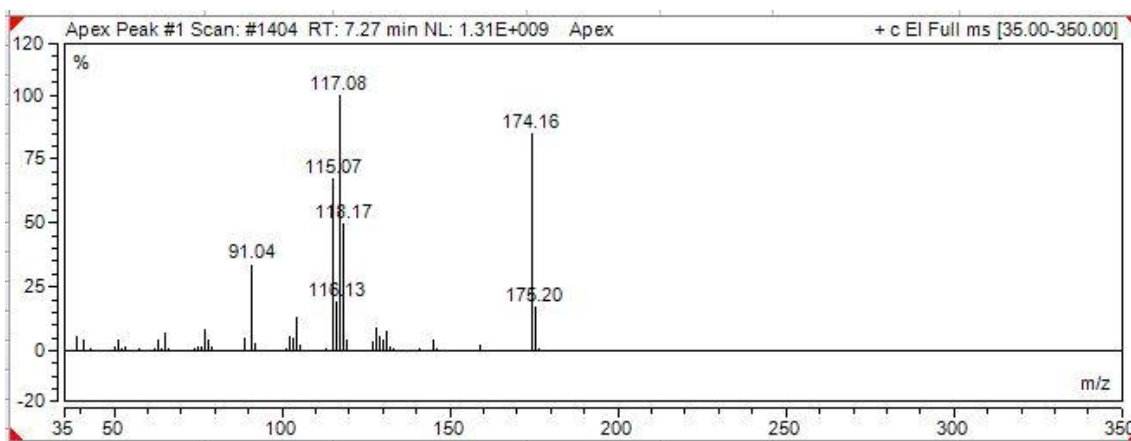

(iv) GC Chromatogram of the reaction mixture of compound 2d:

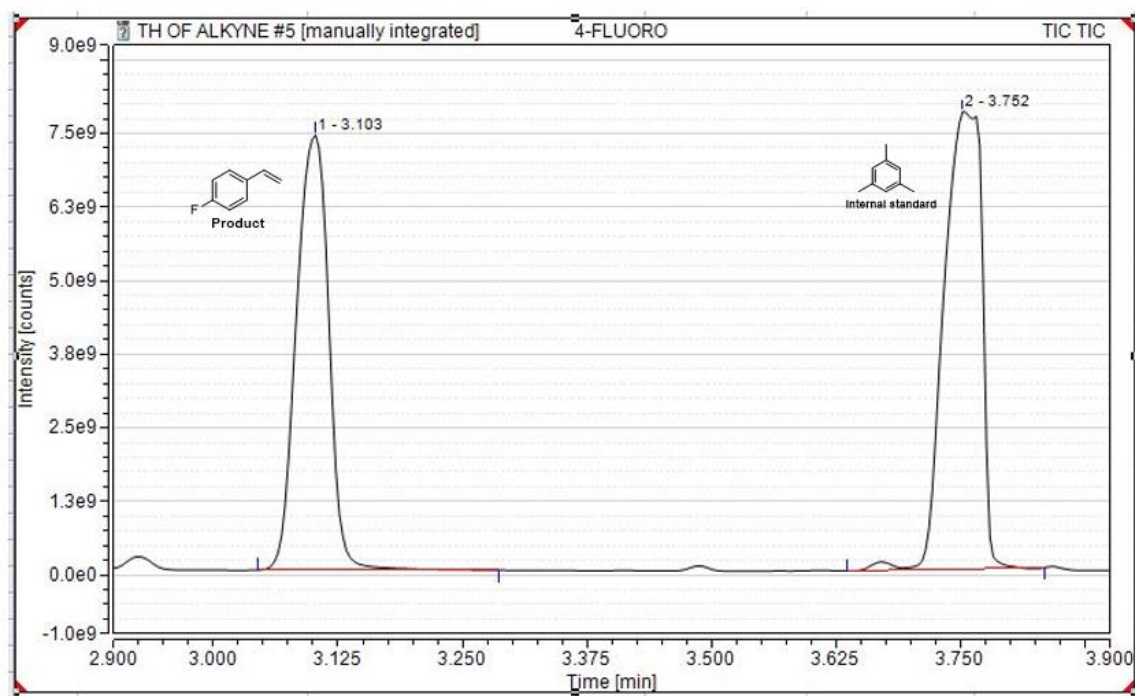

Peak Report

| Peak | Retention Time (min) | Peak Area | Name            |
|------|----------------------|-----------|-----------------|
| 1    | 3.10                 | 277718812 | 4-fluorostyrene |
| 2    | 3.77                 | 341200258 | Mesitylene      |

ESI-MS Spectra of 4-fluorostyrene

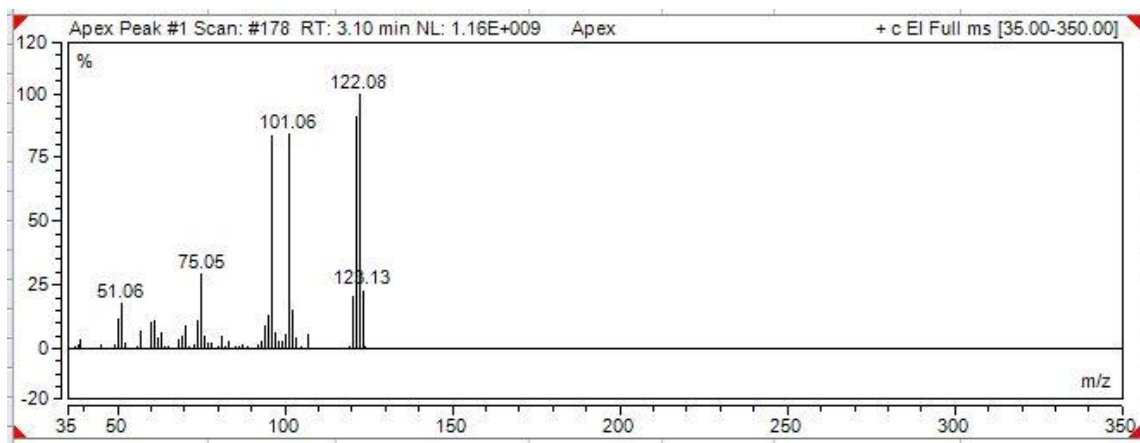

(v) GC Chromatogram of the reaction mixture of compound 2e:

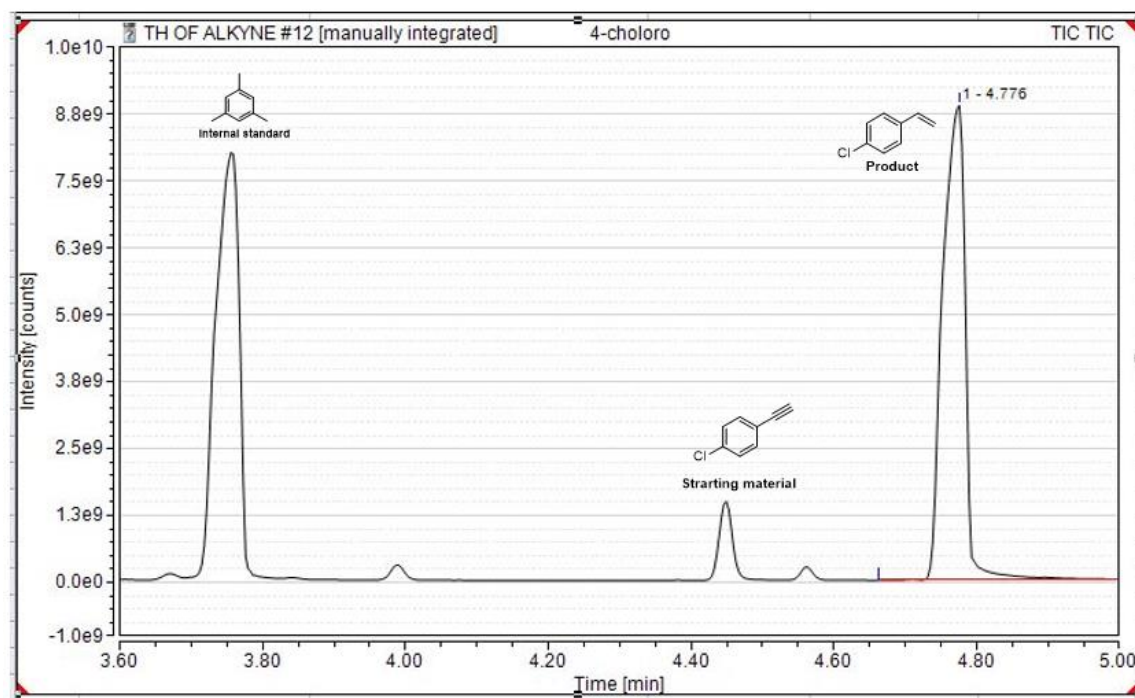

Peak Report

| Peak | Retention Time (min) | Peak Area | Name            |
|------|----------------------|-----------|-----------------|
| 1    | 4.78                 | 302826347 | 4-chlorostyrene |
| 2    | 3.77                 | 293143999 | Mesitylene      |

ESI-MS Spectra of 4-chlorostyrene

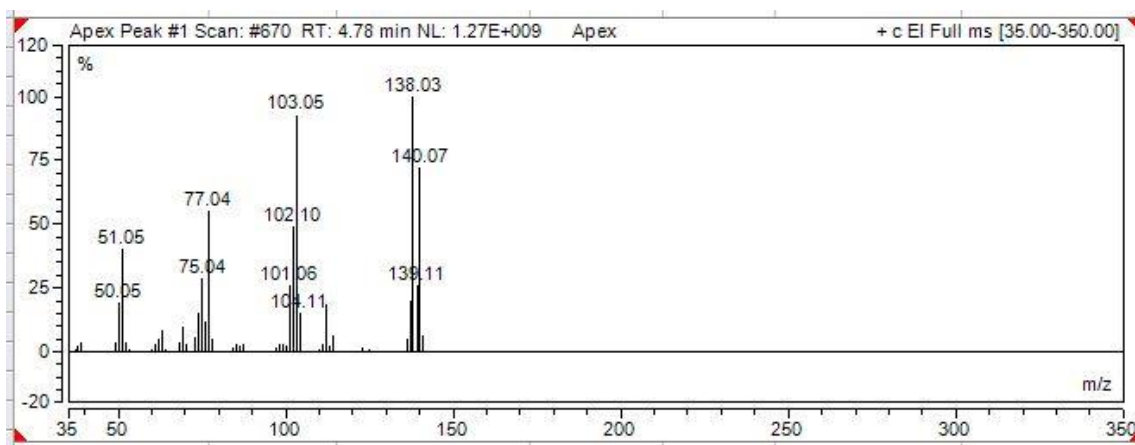

(vi) GC Chromatogram of the reaction mixture of compound 2f:

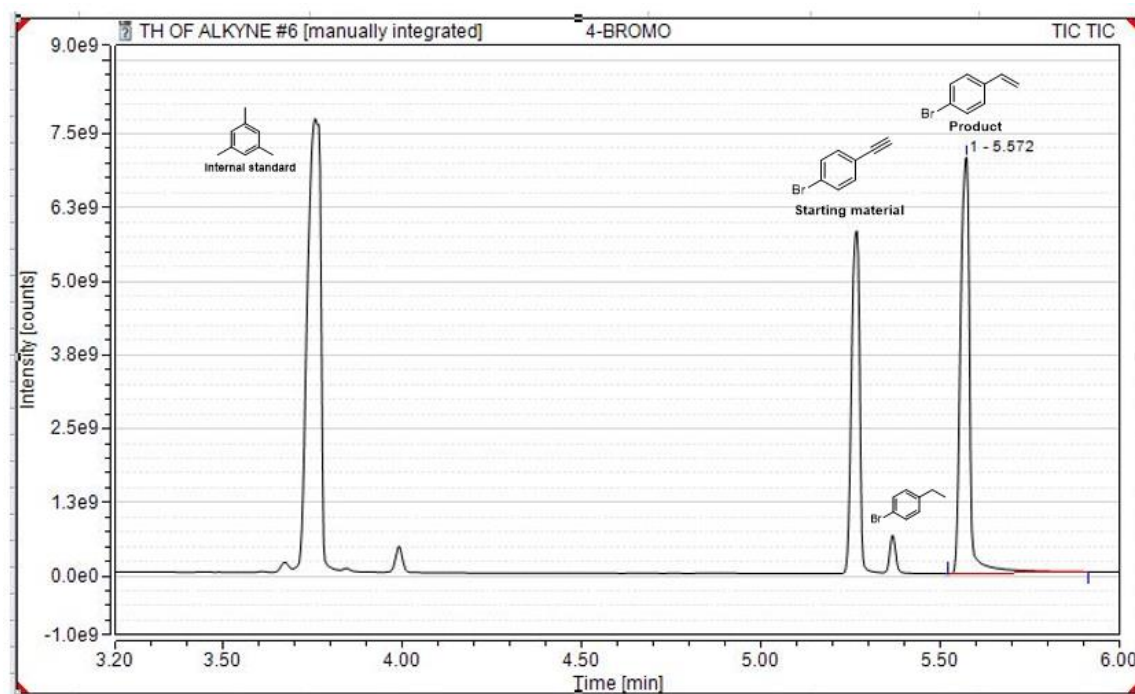

Peak Report

| Peak | Retention Time (min) | Peak Area | Name           |
|------|----------------------|-----------|----------------|
| 1    | 5.57                 | 213939314 | 4-bromostyrene |
| 2    | 3.77                 | 318233497 | Mesitylene     |

ESI-MS Spectra of 4-bromostyrene

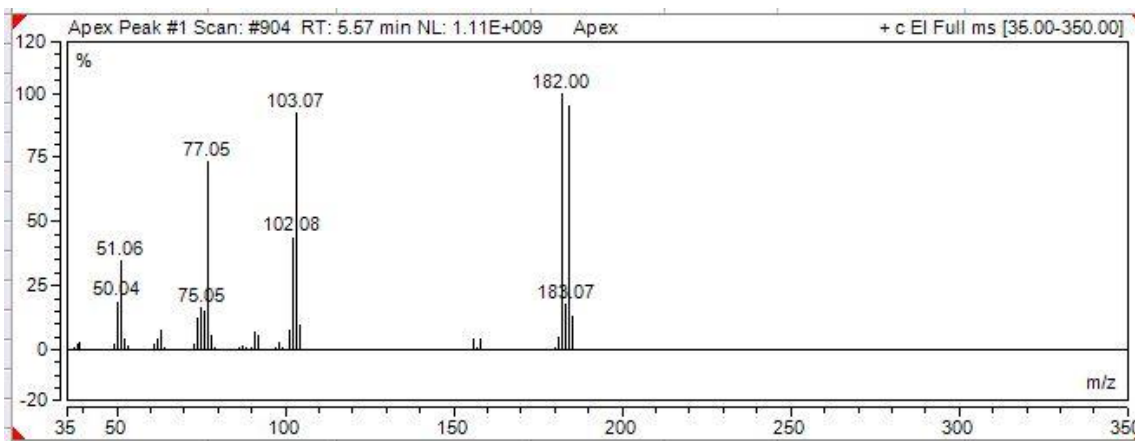

(vii) GC Chromatogram of the reaction mixture of compound 2g:

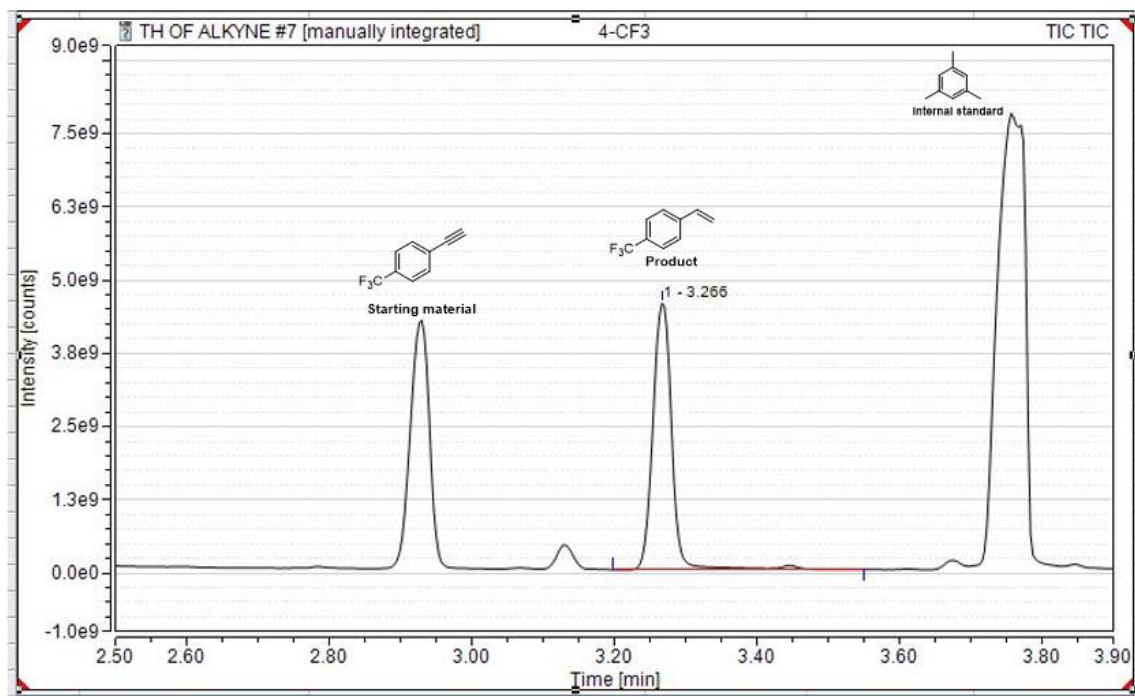

Peak Report

| Peak | Retention Time (min) | Peak Area | Name                       |
|------|----------------------|-----------|----------------------------|
| 1    | 3.27                 | 137492651 | 4-(Trifluoromethyl)styrene |
| 2    | 3.77                 | 334108220 | Mesitylene                 |

ESI-MS Spectra of 4-(Trifluoromethyl)styrene

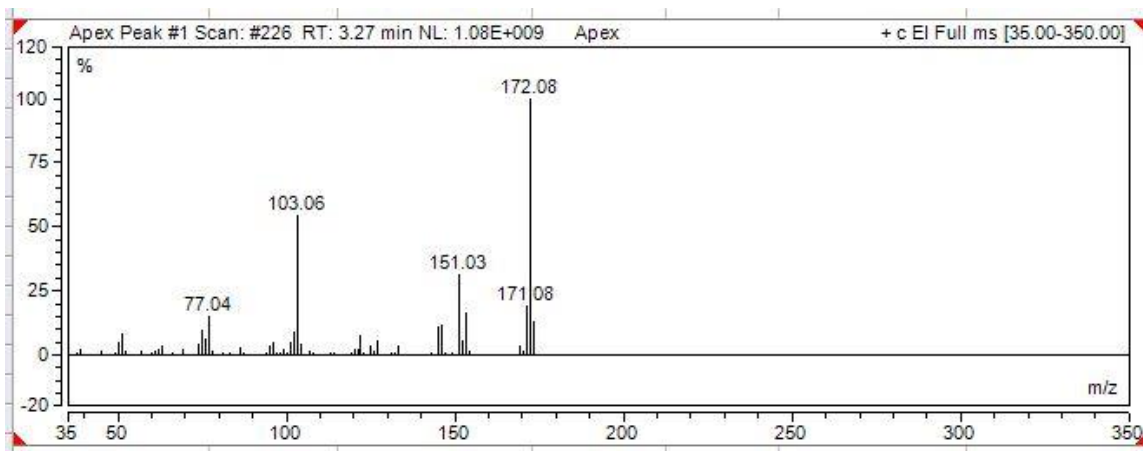

(viii) GC Chromatogram of the reaction mixture of compound 2h:

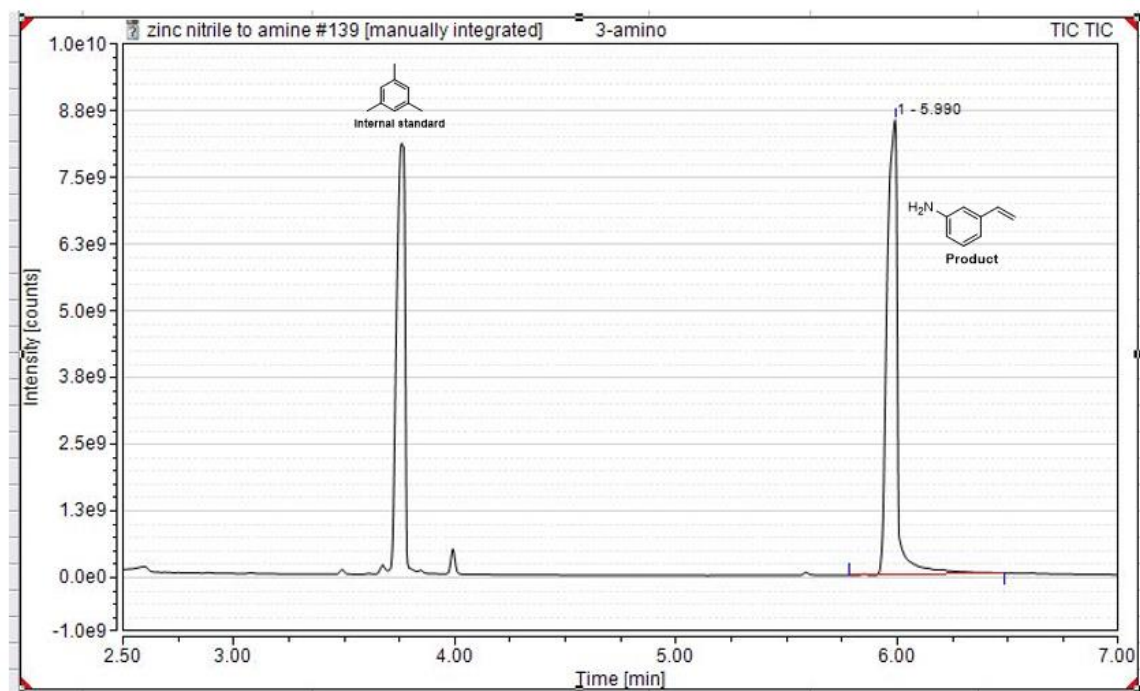

Peak Report

| Peak | Retention Time (min) | Peak Area | Name           |
|------|----------------------|-----------|----------------|
| 1    | 5.99                 | 402698984 | 3-vinylaniline |
| 2    | 3.77                 | 342434800 | Mesitylene     |

ESI-MS Spectra of 3-vinylaniline

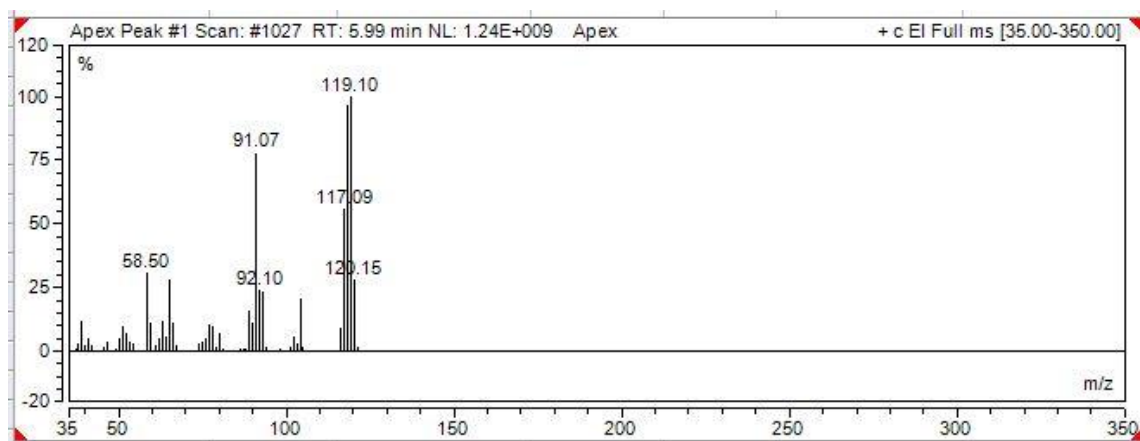

(ix) GC Chromatogram of the reaction mixture of compound 2i:

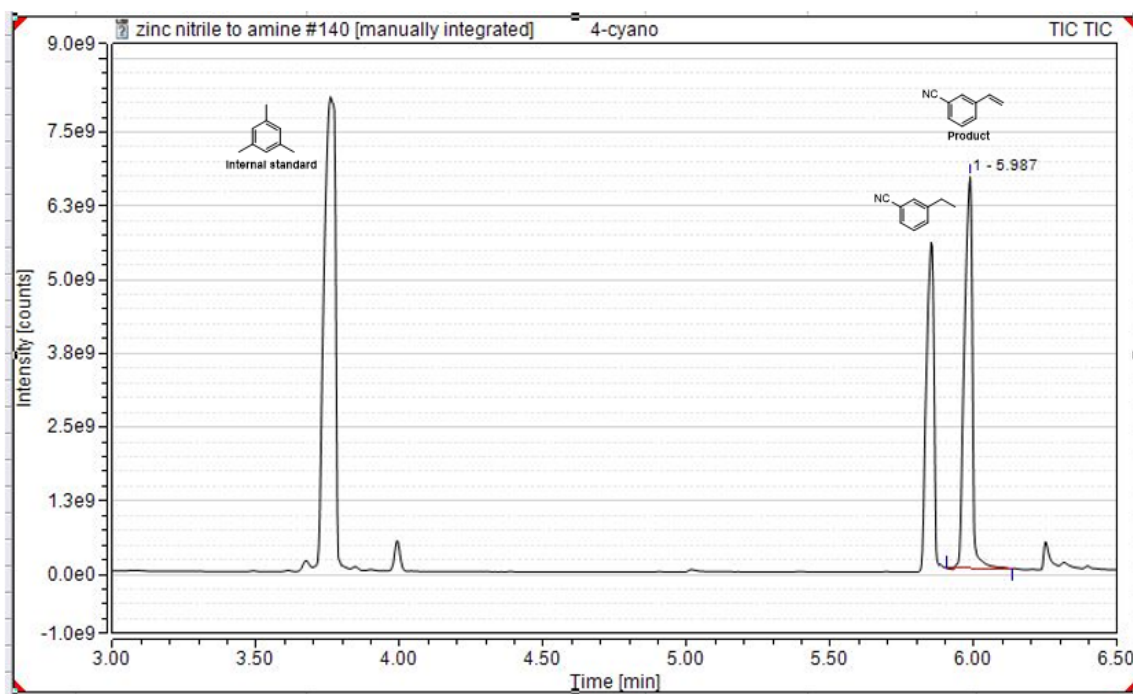

Peak Report

| Peak | Retention Time (min) | Peak Area | Name                |
|------|----------------------|-----------|---------------------|
| 1    | 5.99                 | 195792051 | 3-vinylbenzonitrile |
| 2    | 3.77                 | 355449089 | Mesitylene          |

ESI-MS Spectra of 3-vinylbenzonitrile

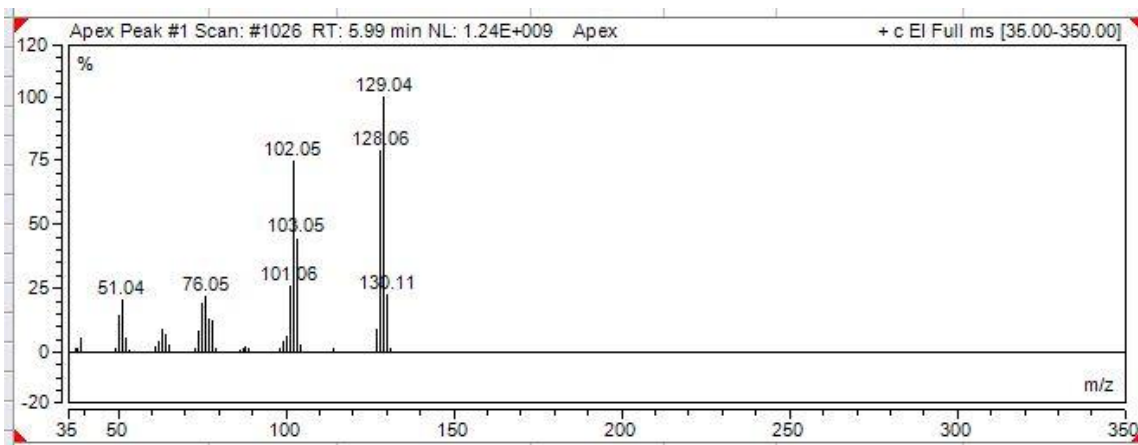

(x) GC Chromatogram of the reaction mixture of compound 2j:

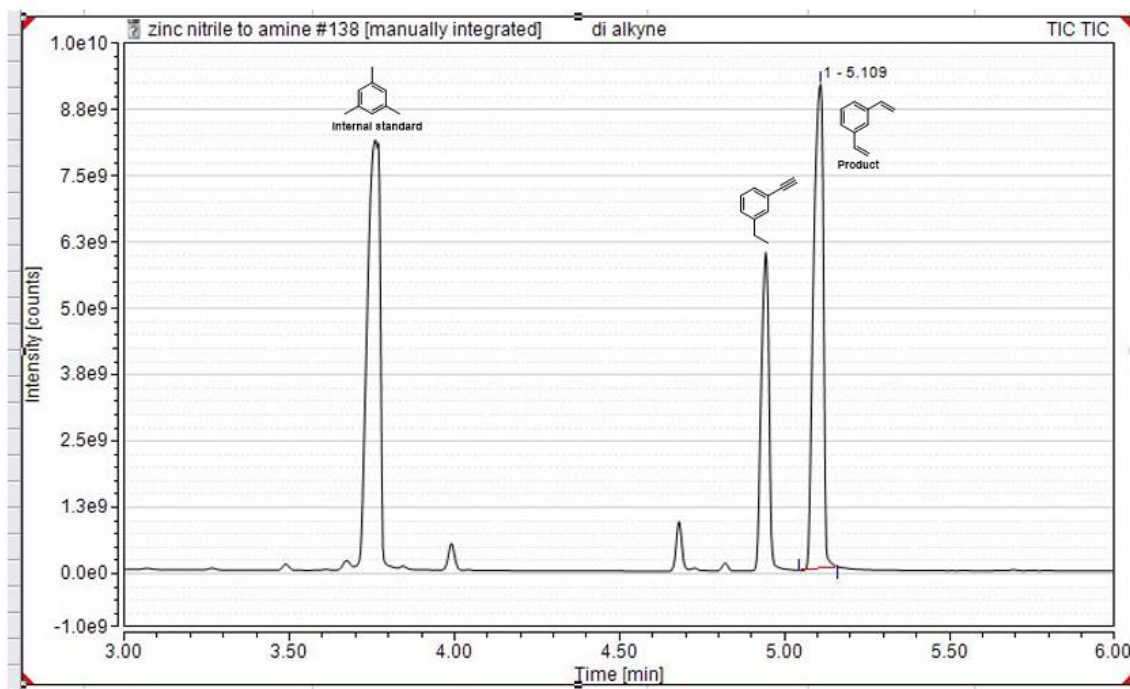

Peak Report

| Peak | Retention Time (min) | Peak Area | Name              |
|------|----------------------|-----------|-------------------|
| 1    | 5.11                 | 305883633 | 1,3-divinylbnzene |
| 2    | 3.77                 | 350314212 | Mesitylene        |

ESI-MS Spectra of 1,3-divinylbnzene

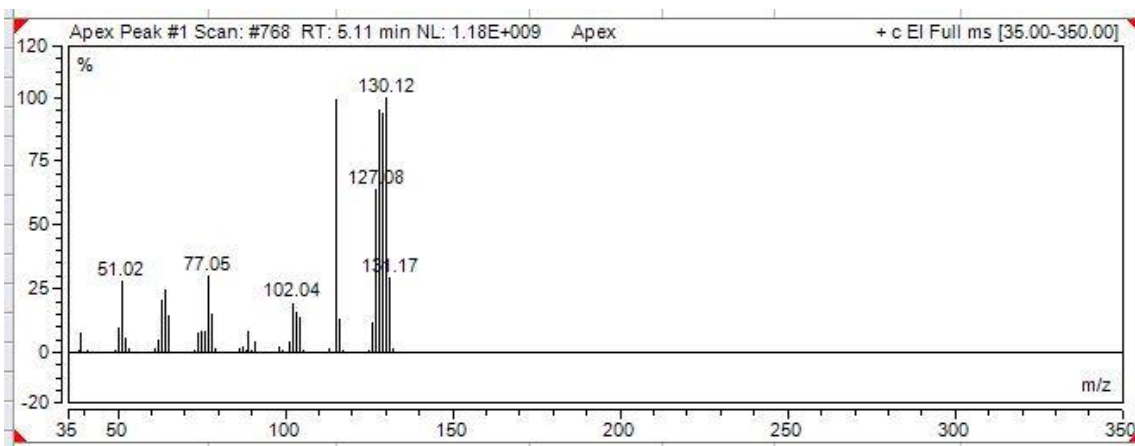

(xi) GC Chromatogram of the reaction mixture of compound 2k:

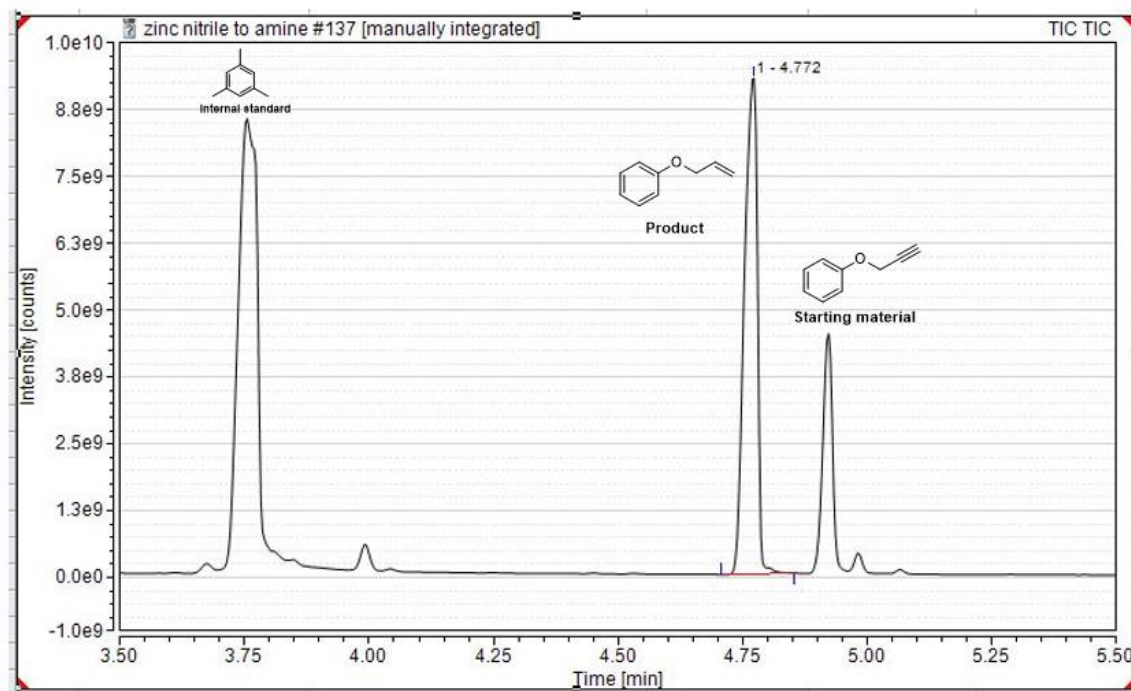

Peak Report

| Peak | Retention Time (min) | Peak Area | Name               |
|------|----------------------|-----------|--------------------|
| 1    | 4.77                 | 277495890 | Allyl phenyl ether |
| 2    | 3.77                 | 350314212 | Mesitylene         |

ESI-MS Spectra of Allyl phenyl ether

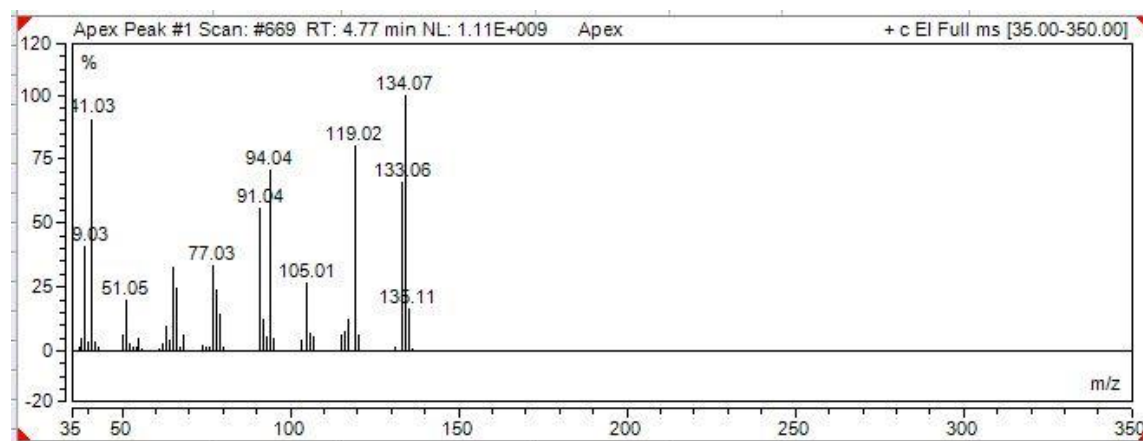

(xii) GC Chromatogram of the reaction mixture of compound 2l:

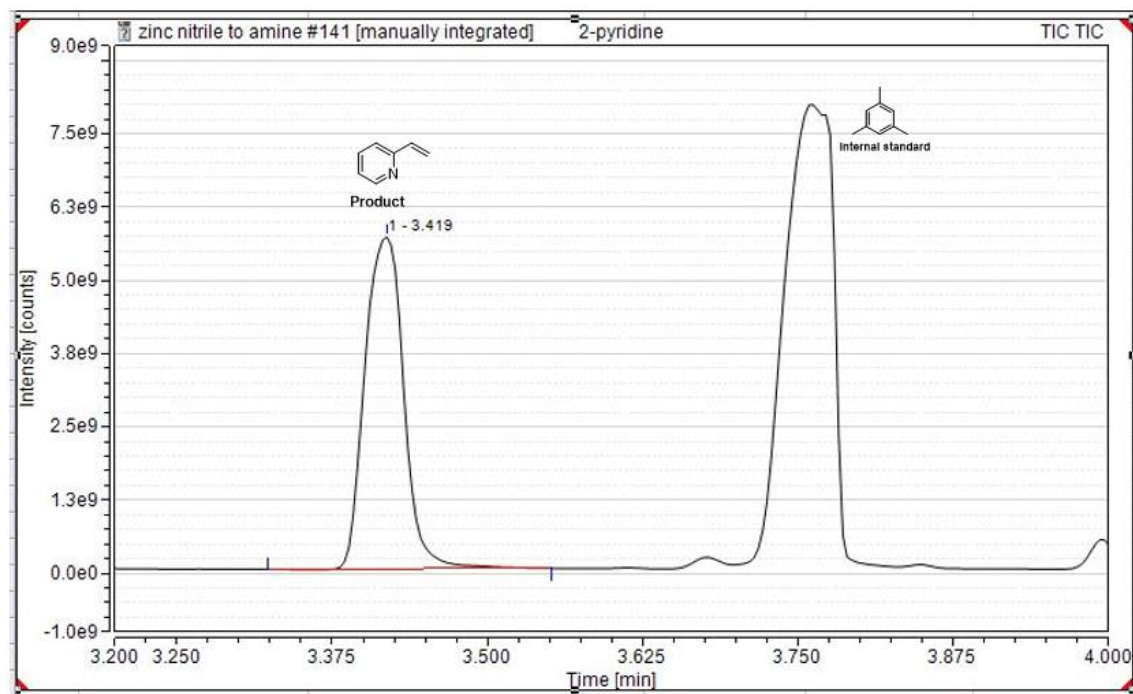

Peak Report

| Peak | Retention Time (min) | Peak Area | Name            |
|------|----------------------|-----------|-----------------|
| 1    | 3.42                 | 206977381 | 2-Vinylpyridine |
| 2    | 3.77                 | 306490750 | Mesitylene      |

ESI-MS Spectra of 2-Vinylpyridine

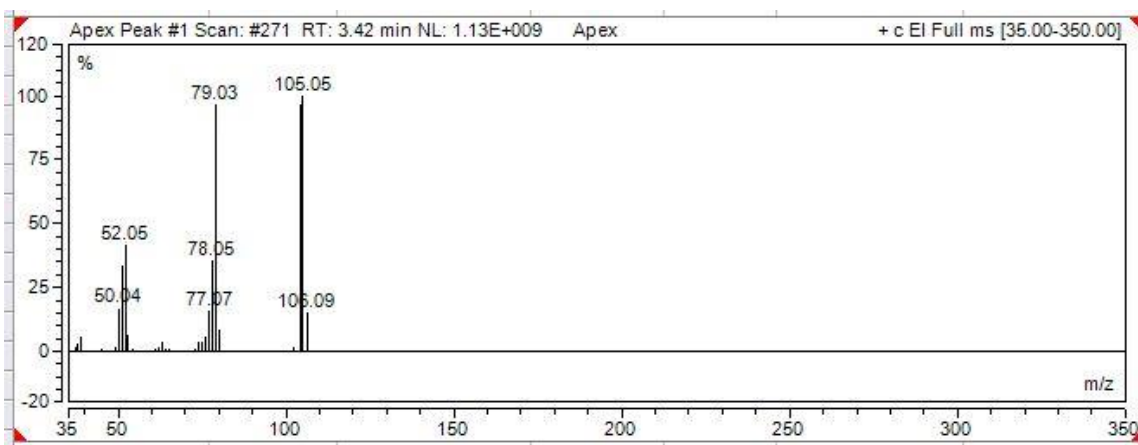

(xiii) GC Chromatogram of the reaction mixture of compound 2m:

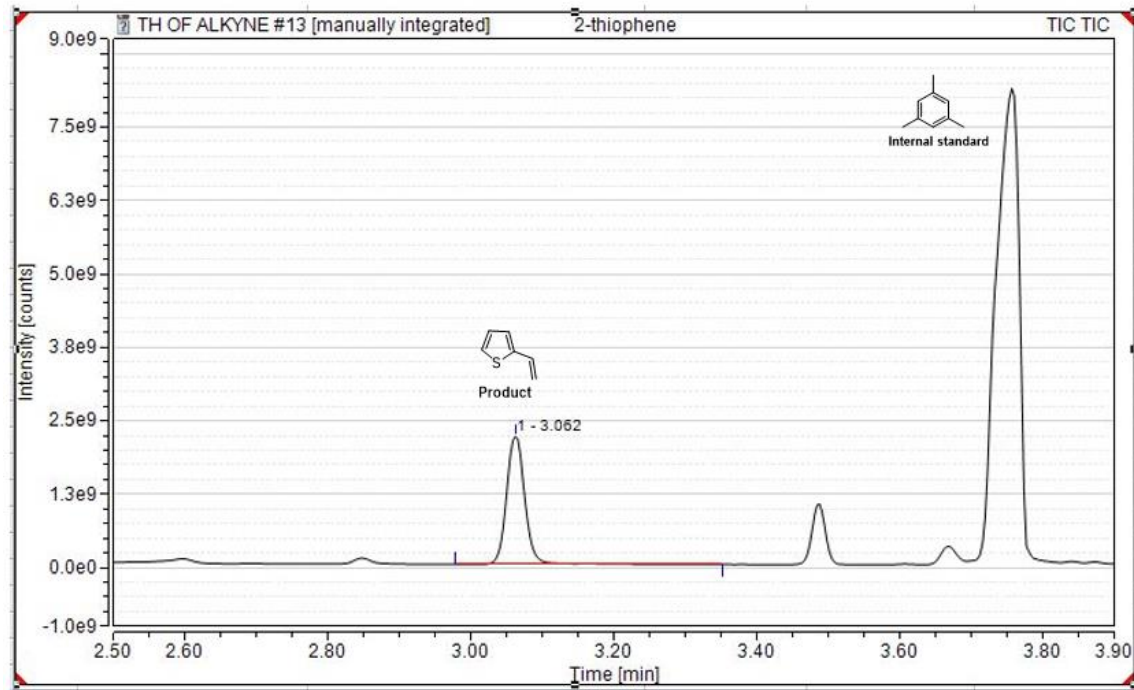

Peak Report

| Peak | Retention Time (min) | Peak Area | Name             |
|------|----------------------|-----------|------------------|
| 1    | 3.06                 | 63998245  | 2-Vinylthiophene |
| 2    | 3.77                 | 291872416 | Mesitylene       |

ESI-MS Spectra of 2-Vinylthiophene

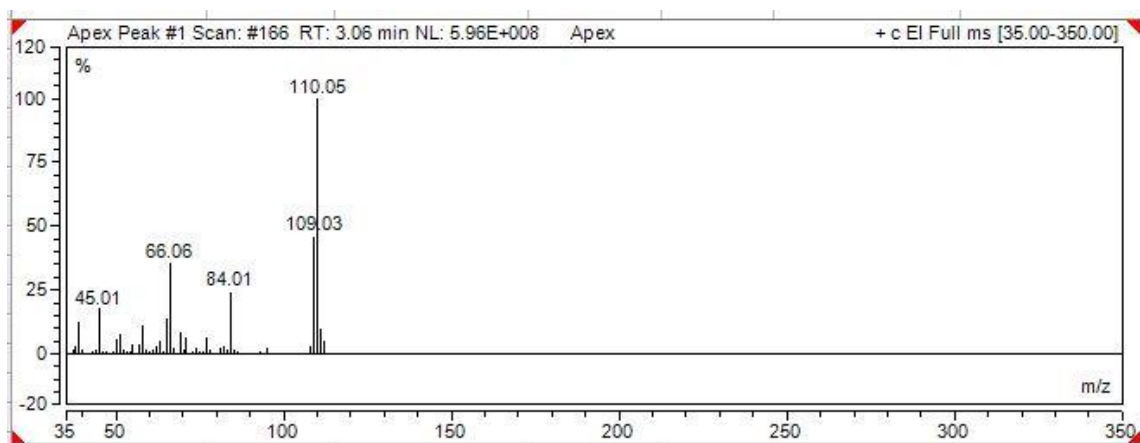

## 10. Crystallographic information of Fe-1 complex

The single crystals of **Fe-1** complex were obtained in DCM solution of **Fe-1** layering with hexane. The single crystal X-ray diffraction measurements were performed to determine the crystal structure at 100 K using APEX3 (Bruker, 2016; Bruker D8 VENTURE Kappa Duo PHOTON II CPAD) diffractometer having graphite-monochromatized (MoK $\alpha$  (0.71073)). The X-ray generator was operated at 50 kV and 30 mA. A preliminary set of unit cell parameters and an orientation matrix were calculated from 36 frames, and the cell refinement was performed by SAINT-Plus (Bruker, 2016). An optimized strategy used for data collection consisted of different sets of  $\varphi$  and  $\omega$  scans with  $0.5^\circ$  steps  $\varphi/\omega$ . The data were collected with a time frame of 10 sec by setting the sample to detector distance fixed at 40 cm. All the data points were corrected for Lorentzian, polarization, and absorption effects using SAINT-Plus and SADABS programs (Bruker, 2016). SHELXS-97 (Sheldrick, 2008) was used for structure solution, and full-matrix least-squares refinement on  $F^2$ .<sup>3,4</sup> The molecular graphics of ORTEP diagrams were performed by Mercury software. The crystal symmetry of the components was cross-checked by running the cif files through PLATON (Spek, 2020) software and notified that no additional symmetry was observed. The Encifer software was used to correct the cif files.

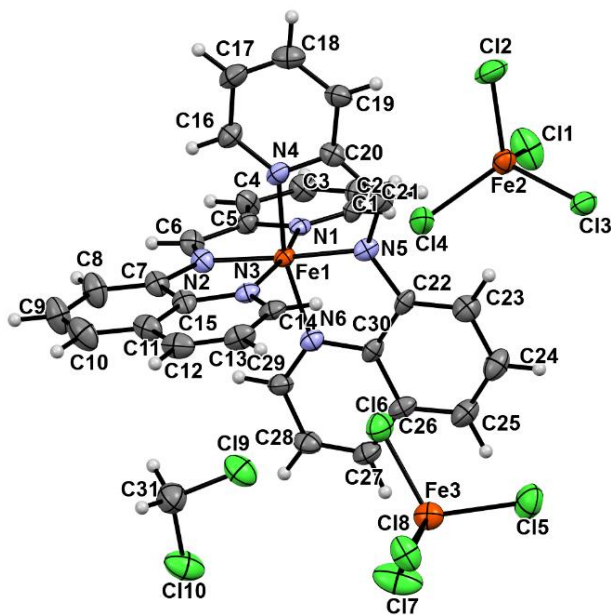

**Figure S11.** ORTEP diagram of compound **Fe-1**, the asymmetric unit contains one molecule of Fe<sup>+2</sup> complex along with two FeCl<sub>4</sub> counter ions and one molecule of Dichloromethane solvent. Herein, the ellipsoids are drawn with a 50% probability.

**Table S1.** Crystallographic information details of compound **Fe-1** complex.

| <b>Crystal data</b>                                                        | <b>Fe-1 Complex</b>                                                                                      |
|----------------------------------------------------------------------------|----------------------------------------------------------------------------------------------------------|
| Chemical formula                                                           | C <sub>30</sub> H <sub>22</sub> FeN <sub>6</sub> ·CH <sub>2</sub> Cl <sub>2</sub> ·2(Cl <sub>4</sub> Fe) |
| Formula weight (M <sub>r</sub> )                                           | 1002.61                                                                                                  |
| Crystal system                                                             | Monoclinic                                                                                               |
| Space group                                                                | <i>P</i> 2 <sub>1</sub> / <i>c</i>                                                                       |
| Temperature T (K)                                                          | 100                                                                                                      |
| a (Å)                                                                      | 10.346 (6)                                                                                               |
| b (Å)                                                                      | 8.963 (5)                                                                                                |
| c (Å)                                                                      | 42.27 (2)                                                                                                |
| α (°)                                                                      | 90                                                                                                       |
| β (°)                                                                      | 94.20 (3)                                                                                                |
| γ (°)                                                                      | 90                                                                                                       |
| Z                                                                          | 4                                                                                                        |
| Volume (Å <sup>3</sup> )                                                   | 3909 (4)                                                                                                 |
| Source of radiation                                                        | MoKα (0.71073)                                                                                           |
| D <sub>calc</sub> (g cm <sup>-3</sup> )                                    | 1.704                                                                                                    |
| Crystal size (mm)                                                          | 0.19×0.1×0.09                                                                                            |
| μ (mm <sup>-1</sup> )                                                      | 1.82                                                                                                     |
| <b>Data collection</b>                                                     |                                                                                                          |
| Diffractometer                                                             | Bruker D8 VENTURE Kappa Duo<br>PHOTON II CPAD                                                            |
| Absorption correction                                                      | Multi-scan (SADABS; Bruker,<br>2016)                                                                     |
| T <sub>min</sub> , T <sub>max</sub>                                        | 0.6008, 0.7456                                                                                           |
| No. of measured,<br>independent and<br>observed [I > 2σ(I)]<br>reflections | 111709, 8514, 6288                                                                                       |

|                                                               |              |
|---------------------------------------------------------------|--------------|
| Theta range (°)                                               | 2.133-27.000 |
| R <sub>int</sub>                                              | 0.129        |
| <b>Refinement</b>                                             |              |
| R[F <sup>2</sup> > 2σ (F <sup>2</sup> )], wR(F <sup>2</sup> ) | 0.082, 0.166 |
| GOF on F <sup>2</sup>                                         | 1.13         |
| No. of independent reflections                                | 8514         |
| No. of parameters                                             | 451          |
| F <sub>000</sub>                                              | 2000         |
| No. of restraints                                             | 0            |
| H-atom treatment                                              | Constr       |
| Δρ <sub>max</sub> , Δρ <sub>min</sub> (e Å <sup>-3</sup> )    | 0.99, -0.69  |
| CCDC number                                                   | 2271237      |

**Table S2.** Bond Distances (Å).

| Bond    | Distance (Å) | Bond    | Distance (Å) |
|---------|--------------|---------|--------------|
| Fe1-N1  | 1.9714(11)   | C1-C2   | 1.3853(8)    |
| Fe1-N2  | 1.8880(11)   | C2-C3   | 1.3798(8)    |
| Fe1-N3  | 1.9597(11)   | C3-C4   | 1.3671(8)    |
| Fe1-N4  | 1.9680(11)   | C4-C5   | 1.3809(8)    |
| Fe1-N5  | 1.8936(11)   | C5-C6   | 1.4560(8)    |
| Fe1-N6  | 1.9622(11)   | C7-C15  | 1.4218(8)    |
| Fe2-Cl2 | 2.2014(13)   | C7-C8   | 1.3708(8)    |
| Fe2-Cl3 | 2.1959(13)   | C8-C9   | 1.4069(8)    |
| Fe2-Cl4 | 2.1979(13)   | C9-C10  | 1.3671(8)    |
| Fe2-Cl1 | 2.1783(13)   | C10-C11 | 1.4299(8)    |
| Fe3-Cl6 | 2.2047(13)   | C11-C12 | 1.4164(8)    |

|          |            |         |           |
|----------|------------|---------|-----------|
| Fe3-Cl7  | 2.1801(13) | C11-C15 | 1.4146(8) |
| Fe3-Cl5  | 2.1901(13) | C12-C13 | 1.3527(8) |
| Fe3-Cl8  | 2.2080(13) | C13-C14 | 1.4129(8) |
| Cl9-C31  | 1.7495(10) | C16-C17 | 1.4045(8) |
| Cl10-C31 | 1.7722(10) | C17-C18 | 1.3832(8) |
| N1-C1    | 1.3253(8)  | C18-C19 | 1.3645(8) |
| N1-C5    | 1.3728(8)  | C19-C20 | 1.4072(8) |
| N2-C6    | 1.3068(8)  | C20-C21 | 1.4338(8) |
| N2-C7    | 1.4173(8)  | C22-C30 | 1.4042(8) |
| N3-C14   | 1.3172(8)  | C22-C23 | 1.3716(8) |
| N3-C15   | 1.3830(8)  | C23-C24 | 1.4049(8) |
| N4-C20   | 1.3730(8)  | C24-C25 | 1.3713(8) |
| N4-C16   | 1.3332(8)  | C25-C26 | 1.4043(8) |
| N5-C22   | 1.4314(8)  | C26-C27 | 1.3965(8) |
| N5-C21   | 1.2980(8)  | C26-C30 | 1.4257(8) |
| N6-C29   | 1.3338(8)  | C27-C28 | 1.3478(8) |
| N6-C30   | 1.3754(8)  | C28-C29 | 1.4160(8) |
| C1-H1    | 0.950      | C17-H17 | 0.950     |
| C2-H2    | 0.950      | C18-H18 | 0.950     |
| C3-H3    | 0.950      | C19-H19 | 0.950     |
| C4-H4    | 0.950      | C21-H21 | 0.950     |
| C6-H6    | 0.950      | C23-H23 | 0.950     |
| C8-H8    | 0.950      | C24-H24 | 0.950     |
| C9-H9    | 0.950      | C25-H25 | 0.950     |
| C10-H10  | 0.950      | C27-H27 | 0.950     |
| C12-H12  | 0.950      | C28-H28 | 0.950     |
| C13-H13  | 0.950      | C29-H29 | 0.950     |

|         |       |          |       |
|---------|-------|----------|-------|
| C14-H14 | 0.950 | C31-H31A | 0.990 |
| C16-H16 | 0.950 | C3-H31B  | 0.990 |

**Table S3.** Bond Angles (°)

| Bond        | Angles (°) | Bond        | Angles (°) |
|-------------|------------|-------------|------------|
| N1-Fe1-N2   | 81.49(3)   | Fe1-N1-C5   | 113.44(3)  |
| N1-Fe1-N3   | 164.67(3)  | C1-N1-C5    | 116.89(3)  |
| N1-Fe1-N4   | 93.71(3)   | Fe1-N2-C7   | 116.63(3)  |
| N1-Fe1-N5   | 97.59(3)   | C6-N2-C7    | 125.07(3)  |
| N1-Fe1-N6   | 90.21(3)   | Fe1-N2-C6   | 118.29(3)  |
| N2-Fe1-N3   | 83.39(3)   | Fe1-N3-C14  | 130.88(3)  |
| N2-Fe1-N4   | 96.22(3)   | Fe1-N3-C15  | 111.91(3)  |
| N2-Fe1-N5   | 177.21(3)  | C14-N3-C15  | 117.18(3)  |
| N2-Fe1-N6   | 98.84(3)   | C16-N4-C20  | 118.57(3)  |
| N3-Fe1-N4   | 90.47(3)   | Fe1-N4-C20  | 112.50(3)  |
| N3-Fe1-N5   | 97.62(3)   | Fe1-N4-C16  | 128.92(3)  |
| N3-Fe1-N6   | 89.56(3)   | Fe1-N5-C22  | 114.91(3)  |
| N4-Fe1-N5   | 81.18(3)   | Fe1-N5-C21  | 118.69(3)  |
| N4-Fe1-N6   | 164.84(3)  | C21-N5-C22  | 126.39(3)  |
| N5-Fe1-N6   | 83.79(3)   | C29-N6-C30  | 118.92(3)  |
| Cl1-Fe2-Cl3 | 105.53(3)  | Fe1-N6 -C29 | 129.15(3)  |
| Cl1-Fe2-Cl4 | 108.45(3)  | Fe1-N6-C30  | 111.90(3)  |
| Cl2-Fe2-Cl3 | 112.73(3)  | N1-C1-C2    | 123.11(3)  |
| Cl2-Fe2-Cl4 | 107.83(3)  | C1-C2 -C3   | 119.33(3)  |
| Cl3-Fe2-Cl4 | 110.23(3)  | C2-C3-C4    | 118.88(3)  |
| Cl1-Fe2-Cl2 | 112.01(3)  | C3-C4-C5    | 119.04(3)  |
| Cl5-Fe3-Cl6 | 110.27(3)  | C4-C5-C6    | 124.56(3)  |

|             |           |             |           |
|-------------|-----------|-------------|-----------|
| Cl5-Fe3-Cl7 | 110.60(3) | N1-C5-C4    | 122.72(3) |
| Cl6-Fe3-Cl7 | 109.08(3) | N1-C5-C6    | 112.72(3) |
| Cl6-Fe3-Cl8 | 107.42(3) | N2-C6-C5    | 114.05(3) |
| Cl7-Fe3-Cl8 | 110.54(3) | C8-C7-C15   | 121.38(3) |
| Cl5-Fe3-Cl8 | 108.88(3) | N2-C7-C15   | 110.66(3) |
| Fe1-N1-C1   | 129.64(3) | N2-C7-C8    | 127.95(3) |
| C7-C8-C9    | 118.69(3) | C25-C26-C27 | 125.84(3) |
| C8-C9-C10   | 121.19(3) | C26-C27-C28 | 121.17(3) |
| C9-C10-C11  | 121.82(3) | C27-C28-C29 | 119.31(3) |
| C10-C11-C12 | 126.04(3) | N6-C29-C28  | 121.94(3) |
| C12-C11-C15 | 117.33(3) | N6-C30-C22  | 117.46(3) |
| C10-C11-C15 | 116.63(3) | N6-C30-C26  | 121.41(3) |
| C11-C12-C13 | 120.16(3) | C22-C30-C26 | 121.13(3) |
| C12-C13-C14 | 118.64(3) | N1-C1-H1    | 118       |
| N3-C14-C13  | 124.35(3) | C2-C1-H1    | 118       |
| N3-C15-C7   | 117.38(3) | C3-C2-H2    | 120       |
| N3-C15-C11  | 122.33(3) | C1-C2-H2    | 120       |
| C7-C15-C11  | 120.29(3) | C2-C3-H3    | 121       |
| N4-C16-C17  | 121.81(3) | C4-C3-H3    | 121       |
| C16-C17-C18 | 119.19(3) | C3-C4-H4    | 120       |
| C17-C18-C19 | 120.07(3) | C5-C4-H4    | 120       |
| C18-C19-C20 | 118.53(3) | C5-C6-H6    | 123       |
| C19-C20-C21 | 123.96(3) | N2-C6-H6    | 123       |
| N4-C20-C19  | 121.81(3) | C9-C8-H8    | 121       |
| N4-C20-C21  | 114.24(3) | C7-C8-H8    | 121       |
| N5-C21-C20  | 113.37(3) | C8-C9-H9    | 119       |
| C23-C22-C30 | 119.95(3) | C10-C9-H9   | 119       |

|              |           |               |           |
|--------------|-----------|---------------|-----------|
| N5-C22-C23   | 128.07(3) | C11-C10-H10   | 119       |
| N5-C22-C30   | 111.93(3) | C9-C10-H10    | 119       |
| C22-C23-C24  | 119.41(3) | C11-C12-H12   | 120       |
| C23-C24-C25  | 121.20(3) | C13-C12-H12   | 120       |
| C24-C25-C26  | 121.20(3) | C12-C13-H13   | 121       |
| C25-C26-C30  | 116.96(3) | C14-C13-H13   | 121       |
| C27-C26-C30  | 117.20(3) | N3-C14-H14    | 118       |
| C13-C14-H14  | 118       | C24-C25-H25   | 119       |
| C17-C16-H16  | 119       | C26-C25-H25   | 119       |
| N4-C16-H16   | 119       | C26-C27-H27   | 119       |
| C16-C17-H17  | 120       | C28-C27-H27   | 119       |
| C18-C17-H17  | 120       | C27-C28-H28   | 120       |
| C19-C18-H18  | 120       | C29-C28-H28   | 120       |
| C17-C18 -H18 | 120       | C28-C29-H29   | 119       |
| C18-C19-H19  | 121       | N6-C29-H29    | 119       |
| C20-C19-H19  | 121       | C19-C31-Cl10  | 111.32(3) |
| N5-C21-H21   | 123       | C19-C31-H31A  | 109       |
| C20-C21-H21  | 123       | C19-C31-H31B  | 109       |
| C24-C23-H23  | 120       | Cl10-C31-H31A | 109       |
| C22 -C23-H23 | 120       | Cl10-C31-H31B | 109       |
| C23-C24-H24  | 119       | H31A-C31-H31B | 108       |
| C25-C24-H24  | 119       |               |           |

**Table S4.** Hydrogen-bond geometry (Å° and °) of **Fe-1** complex are given as below:

| Name of the compound | <i>D</i> –H··· <i>A</i> | <i>D</i> –H | H··· <i>A</i> | <i>D</i> ··· <i>A</i> | <i>D</i> –H··· <i>A</i> |
|----------------------|-------------------------|-------------|---------------|-----------------------|-------------------------|
| <b>Fe-1</b>          | C2–H2···C11             | 0.950       | 2.690         | 3.532(2)              | 148                     |
|                      | C10–H10···C17           | 0.950       | 2.810         | 3.678(2)              | 153                     |
|                      | C21–H21···C14           | 0.950       | 2.790         | 3.719(2)              | 168                     |
|                      | C29–H29···C18           | 0.950       | 2.760         | 3.615(2)              | 150                     |

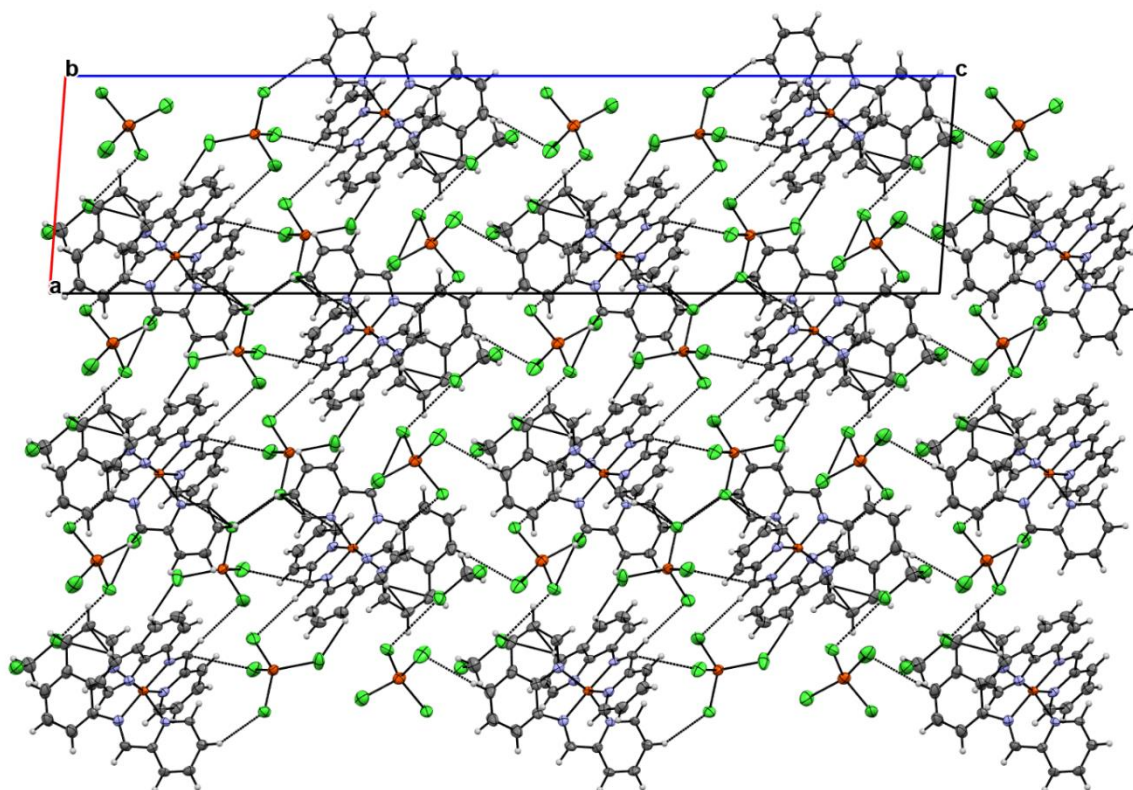

**Figure S12.** Crystal packing of **Fe-1** complex.

**$^1\text{H}$  and  $^{13}\text{C}\{^1\text{H}\}$  NMR spectra of 2a:**

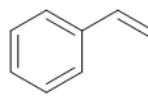

**Figure S13.**  $^1\text{H}$  spectrum (600 MHz) of **2a** in  $\text{CDCl}_3$ .

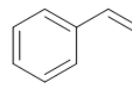

**Figure S14.**  $^{13}\text{C}\{^1\text{H}\}$  spectrum (125 MHz) of **2a** in  $\text{CDCl}_3$ .

**$^1\text{H}$  and  $^{13}\text{C}\{^1\text{H}\}$  NMR spectra of **2b**:**

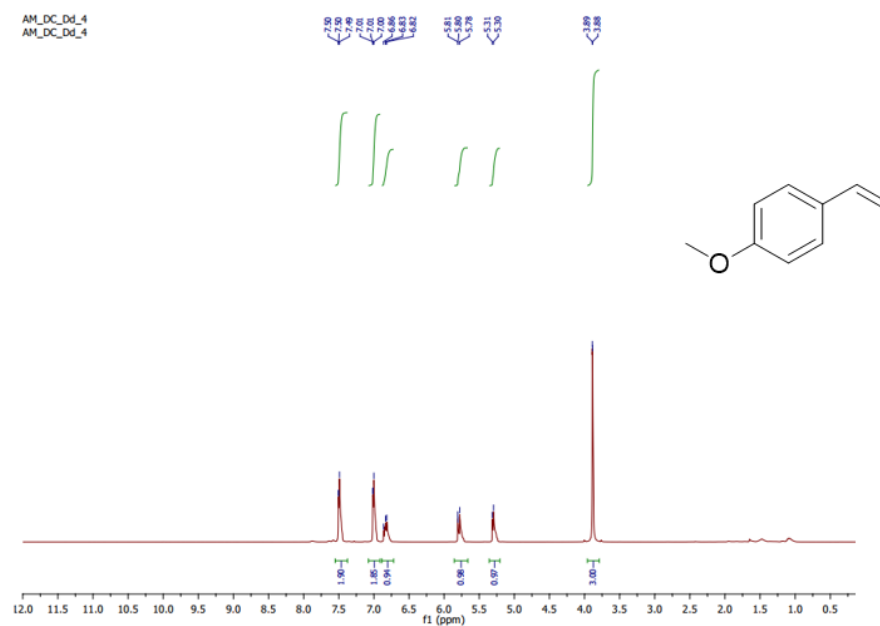

**Figure S15.**  $^1\text{H}$  spectrum (600 MHz) of **2b** in  $\text{CDCl}_3$ .

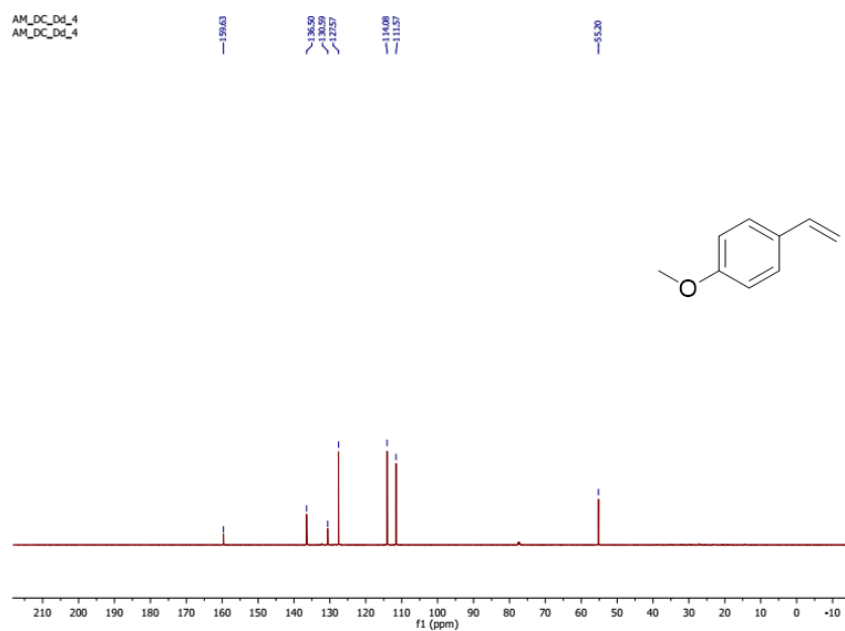

**Figure S16.**  $^{13}\text{C}\{^1\text{H}\}$  spectrum (125 MHz) of **2b** in  $\text{CDCl}_3$ .

## 12. References:

- (1) N. Podder, S. Mandal, *New J. Chem.*, 2020, **44**, 12793-12805.
- (2) Q. Liu, L. Yang, C. Yao, J. Geng, Y. Wu, X. Hu, *Org. Lett.* 2021, **23**, 3685-3690.
- (3) G. M. Sheldrick, Crystal structure refinement with SHELXL, *Acta Cryst.*, 2015, **C71**, 3-8.
- (4) G. M. Sheldrick, SHELXT - Integrated space-group and crystal-structure determination, *Acta Cryst.*, 2015, **A71**, 3–8.
